1  
2  
3  
4  
5  
6  
7  
8  
9  
10  
11  
12  
13  
14  
15  
16

**Microglial P2X4 receptors promote ApoE degradation and cognitive deficits in Alzheimer disease**

Jennifer Hua<sup>1,2</sup>, Elvira Garcia de Paco<sup>1,2</sup>, Nathalie Linck<sup>1,2</sup>, Tangui Maurice<sup>3</sup>, Catherine Desrumaux<sup>3</sup>, Bénédicte Manoury<sup>4</sup>, François Rassendren<sup>1,2,\$</sup> and Lauriane Ulmann<sup>1,2,\$,%</sup>

<sup>1</sup>IGF, Univ Montpellier, CNRS, INSERM, Montpellier, France. <sup>2</sup>LabEx Ion Channel Science and Therapeutics, Montpellier, France. <sup>3</sup>MMDN, Univ Montpellier, EPHE, INSERM, Montpellier, France. <sup>4</sup>Institut Necker Enfants Malades, INSERM, CNRS, Université de Paris, Paris, France

\$ Co-senior authors

% Corresponding author: [lauriane.ulmann@igf.cnrs.fr](mailto:lauriane.ulmann@igf.cnrs.fr)

17

18 **Abstract**

19 Numerous evidence support that microglia contributes to the progression of  
20 Alzheimer's disease. P2X4 receptors are ATP-gated channels, which are *de novo*  
21 expressed in a subset of reactive microglia associated to various pathological contexts,  
22 contributing to microglial functions. Here, we investigated the role of P2X4 in the  
23 context of Alzheimer disease (AD). In both human AD brain and APP<sup>swe</sup>/PSEN1<sup>dE9</sup>  
24 mice, P2X4 is almost exclusively expressed in plaque associated microglia. Genetic  
25 deletion of *P2rx4* results in the reversal of cognitive declines and in a lower amount of  
26 soluble A $\beta$ 1-42 in 12 months old APP/PS1 mice, while no obvious alteration of plaque  
27 associated microglia characteristics is observed. Using proteomic, we identified ApoE  
28 as a specific P2X4 interacting protein. We found that P2X4 regulates lysosomal  
29 cathepsin B activity promoting ApoE degradation; *P2rx4* deletion results in higher  
30 amount of intracellular and secreted ApoE in both BMDM and microglia from APP/PS1  
31 brain. Our results support that microglial P2X4 promotes lysosomal ApoE degradation,  
32 indirectly altering A $\beta$  peptide clearance, which in turn might promote synaptic  
33 dysfunctions and cognitive deficits. Our findings also uncover a specific interplay  
34 between purinergic signaling, microglial ApoE, sA $\beta$  species and cognitive deficits  
35 associated with AD.

36

37

38

## 39 **Introduction**

40 Alzheimer's disease (AD), a slowly progressive, irreversible and incurable  
41 neurodegenerative disease, is the most common form of dementia in human. The main  
42 pathological hallmarks of AD are amyloid- $\beta$  (A $\beta$ ) accumulation in plaques,  
43 hyperphosphorylated Tau aggregation in neurofibrillary tangles, neuronal loss, brain  
44 atrophy and gliosis<sup>1</sup>. For decades, AD was mainly considered as a neuronal disease,  
45 glial cells being only considered as reacting to neuronal alterations. This neurocentric  
46 view considerably evolved in the past ten years, with both genetic and functional  
47 studies showing that neuroinflammation contributes significantly to the onset and  
48 progression of AD<sup>2</sup>. Indeed, genome-wide association studies (GWAS) support that  
49 approximately 50% of the susceptibility genes associated with AD are not related to  
50 neurons but to glial and vascular cells and point towards innate immune system  
51 involvement<sup>3-5</sup>. In the CNS, inflammation is mainly driven by two cell types, microglial  
52 cells and astrocytes. Microglia, the brain resident macrophages, are the main  
53 immunocompetent cells, which in the healthy brain, have different homeostatic  
54 functions such as monitoring neuronal activity, shaping dendritic spines, and even  
55 influencing synaptic activity<sup>6</sup>. In pathological conditions, microglia enter into reactive  
56 states characterized by a transcriptional and functional remodeling. Using single cell  
57 RNAseq analysis, recent studies revealed that microglial reactivity evolves along the  
58 disease progression, generating microglial diversity and culminating with the so-called  
59 Disease-Associated Microglia (DAM) signature characterized, among others, by the  
60 upregulation of many genes identified by GWAS such as ApoE<sup>7,8</sup>.

61 Three ApoE alleles exist in the human population  $\epsilon$ 2,  $\epsilon$ 3 and  $\epsilon$ 4,  $\epsilon$ 4 being the strongest  
62 genetic risk factor of sporadic AD identified so far<sup>9</sup>. One of the proposed mechanisms  
63 by which ApoE could favor AD is through a direct interaction between A $\beta$  and ApoE.  
64 Studies have shown that ApoE can impact both A $\beta$  seeding, fibrillogenesis and  
65 clearance in an isoform dependent manner<sup>10,11</sup>, ApoE4 being more prone to facilitate  
66 seeding and to reduce A $\beta$  clearance<sup>12,13</sup>. ApoE functions in the CNS are nonetheless  
67 diverse and complex and likely contribute to AD through additional mechanisms.  
68 Recent data particularly revealed that both Trem2 and ApoE are critical regulators of  
69 microglial switch from homeostatic to neurodegenerative phenotype<sup>14,15</sup> and genetic  
70 ablation of either gene results in a larger proportion of microglia in homeostatic state  
71 in mouse models of AD<sup>15,16</sup>.

72 Purinergic signaling is central to microglial biology in both healthy and pathological  
73 conditions<sup>17</sup>. Indeed, microglia express a large repertoire of purinergic receptors as  
74 well as different proteins involved in ATP release or degradation<sup>17</sup>. Microglial purinergic  
75 receptor expression is highly dependent on the state of microglia. In the homeostatic  
76 state, *P2ry12* gene is among the most expressed, while its expression is strongly down  
77 regulated in reactive states<sup>18</sup>. Conversely, P2X4 receptor, an ATP-gated channel, is  
78 not present in homeostatic microglia but its expression is induced upon activation<sup>19</sup>.  
79 As a consequence, reactive microglia loses or acquires functions associated with these  
80 two receptors.

81 In reactive microglia, P2X4 receptors have been linked to different functions and  
82 pathologies. In neuropathic pain models, *de novo* P2X4 expression in spinal cord  
83 microglia enhances local network excitability<sup>20</sup>. Similarly, following a *status epilepticus*,  
84 P2X4 hippocampal microglia likely contribute to microglial-evoked neuroinflammation  
85 and neuronal death<sup>21</sup>. Generally, pharmacological or genetic blockade of P2X4  
86 receptors has beneficial effects in different acute CNS pathologies<sup>22</sup>.

87 However, potential involvement of P2X receptors in neurodegenerative diseases  
88 associated with inflammation is still poorly documented. Recently, the exploration of  
89 P2X7 in AD reveals detrimental functions, inducing chemokines release or T cells  
90 recruitment<sup>23</sup>. Whether P2X4 have detrimental or beneficial effects in slowly  
91 progressing neurodegenerative disease remains to be elucidated. Here, we  
92 investigated the potential role of P2X4 in AD. Our results show that in APP/PS1 mice,  
93 P2X4 is almost exclusively expressed in plaque associated microglia. Genetic deletion  
94 of *P2rx4* in APP/PS1 mice reverses cognitive declines and is associated with a lower  
95 amount of soluble A $\beta$ 1-42. In myeloid cells, P2X4 specifically interact with ApoE and  
96 triggers its degradation by regulating cathepsin B activity and *P2rx4* deletion results in  
97 higher amount of intracellular and secreted ApoE in both BMDM and microglia from  
98 APP/PS1 brain. Our results support that microglial P2X4 promotes lysosomal ApoE  
99 degradation, indirectly altering A $\beta$  peptide clearance, which in turn might promote  
100 synaptic dysfunctions and cognitive deficits.

101

## 102 **Results**

103

### 104 ***P2X4 is predominantly expressed in plaque-associated microglia***

105 In most regions of the healthy brain, P2X4 receptors are expressed at low level except  
106 in a few regions such as the pyramidal cell layer of the hippocampus or the arcuate  
107 nucleus of the hypothalamus<sup>24,25</sup>, where a higher expression of the receptor was  
108 reported. Yet, in pathological conditions, both microglia and neurons might up regulate  
109 P2X4 expression<sup>26</sup>. Except few transcriptomic data, P2X4 expression in AD has not  
110 yet been observed<sup>27</sup>. We therefore analyzed whether P2X4 is upregulated in AD brain  
111 and determine in which regions and cell type. Using cortices slices of control and AD  
112 human patients, immunohistochemistry reveals a strong P2X4 immunostaining  
113 colocalized with Iba1, a specific marker of microglial cells, and amyloid plaques  
114 staining, while in control brain P2X4 staining was almost absent (**fig. 1A**). In the cortex  
115 of 12 months old APP/PS1 mice, P2X4 antibody reveals cluster of positive  
116 immunostaining, that was absent from WT mice. Co-staining of Iba1 shows a strong  
117 co-localization of P2X4 in microglia clustered around amyloid plaques deposit (**fig. 1B,**  
118 **C**). No obvious P2X4 staining was found outside these patches (**fig. 1D**). These results  
119 indicate that in AD brain, P2X4 is specifically up regulated in a subpopulation of  
120 reactive microglial cells, presumably in the so-called disease associated microglia<sup>7,28</sup>.

121

### 122 ***P2rx4 deletion reverses memory deficits in APP/PS1 mice***

123 Alteration of cognitive performance is a hallmark of all mouse models of AD and  
124 particularly spatio-temporal disorientation is a major early sign of the disease.  
125 APP/PS1 mice display decline of cognitive performance in a variety of learning  
126 behavioral tests meant to assess spatial memory<sup>7,28</sup>. To address the role of P2X4  
127 upregulation in APP/PS1 mice, we generated WT, P2X4<sup>-/-</sup> (so called KO thereafter),  
128 APP/PS1 and APP/PS1xKO animals. First, we used the Hamlet test to assess  
129 topographical memory in the different groups of animals<sup>29,30</sup>. 72 hours after the last  
130 training session, mice were water deprived (WD) for 15 hours. The probe test was  
131 performed by placing mice in the central agora for 10 min. Latency and number of  
132 errors to reach the drink house were analyzed. A second probe test was repeated the  
133 following day, animals being once again placed in the apparatus but in non-water  
134 deprived (NWD) condition. Both WD-WT and WD-KO mice showed a significant  
135 shorter latency to reach the drink house as compared to NWD condition, signing proper  
136 memory (**fig. 2, left panel**, WD-WT: 24.4 ± 7.3s; NWD-WT: 81.5 ± 1.7s; WD-KO: 13.9  
137 ± 3.2s; NWD-KO: 40.9 ± 6s). As expected, WD-APP/PS1 mice did not shown  
138 difference as compared to NWD-APP/PS1 (WD-APP/PS1: 73.5 ± 24.5s and NWD-

139 APP/PS1:  $87.1 \pm 19.5$ s), suggesting impaired memory. Remarkably, learning deficits  
140 observed in APP/PS1 mice were reverted in APP/PS1xKO mice (WD-APP/PS1xKO:  
141  $39 \pm 9$ s and NWD APP/PS1xKO:  $112.4 \pm 22.1$ s) and memory was found similar to both  
142 WT and KO animals.

143 Similar data were found when addressing the total number of errors. The later was  
144 reduced in both WD WT and KO mice as compared with NWD condition (WD-WT:  $14.1$   
145  $\pm 3.9$  vs NWD-WT:  $36.8 \pm 8.2$ ; WD-KO:  $11.1 \pm 3.1$  vs NWD-KO:  $22.3 \pm 4.1$ ). This  
146 difference was absent in WD-APP/PS1 mice (WD:  $33.5 \pm 11.6$  vs NWD:  $40.3 \pm 11.2$ ),  
147 but readily observed in WD-APP/PS1x KO (WD:  $23 \pm 4.5$  vs NWD:  $43.7 \pm 6.8$ ) (**fig. 2**,  
148 **right panel**). Essentially similar findings were obtained in the Morris Water maze (Sup.  
149 fig. 1A, B, C). Locomotor activity of the different genotypes analyzed in the open field  
150 task indicated that both APP/PS1 and APP/PS1xKO mice presented a tendency to  
151 higher locomotion compared to WT and P2X4 KO, ruling out that the alteration  
152 observed in the Hamlet test could relate to mobility deficits (Sup. fig.1D). These results  
153 indicated that invalidation of P2X4 rescued memory deficits observed in APP/PS1  
154 mice.

155

### 156 ***P2X4 deletion reduces sA $\beta$ content***

157 We next assessed whether the deletion of P2X4 could affect amyloid load in APP/PS1  
158 mice. Number of plaques, their average size and the number of microglia associated  
159 with plaques were quantified in the cortex of 12 months APP/PS1 and APP/PS1xKO  
160 after AmyloGlo staining (**fig. 3A**). As show in **figure 3B**, in APP/PS1 mice, P2X4  
161 deletion did not altered density of plaques nor their average seize. The average  
162 number of microglia clustered around plaques was not changed between the two  
163 genotypes (**fig. 3C, D**).

164 Finally, we analyzed if the level of the soluble A $\beta$  (sA $\beta$ ) peptide was affected by P2X4  
165 deletion. Using Western blot analysis of cortical extracts, we found that the amount of  
166 sA $\beta$  was reduced in APP/PS1xKO compared to APP/PS1 mice (**fig. 3E, F**,  $0.52 \pm 0.1$   
167 vs  $1 \pm 0.1$  respectively). Consistent with these findings, quantification of sA $\beta$ <sub>1-42</sub> peptide  
168 by ELISA confirmed the lower amount of soluble A $\beta$  in the cortex of APP/PS1xKO  
169 compared to APP/PS1 ( $0.937 \pm 0.083.6$  ng/mg vs  $1.216 \pm 0.0665$  ng/mg respectively,  
170 **fig. 3G**). All these results indicate that microglial P2X4 is associated with an increase  
171 of sA $\beta$ , which correlates with a decline of memory performances.

172

173 ***P2X4 regulates cellular levels of ApoE***

174 P2X4 receptors present a complex trafficking regulation with a prominent intracellular  
175 localization in the endo-lysosomal compartment<sup>31</sup>. We ask whether deletion of P2X4  
176 could somehow alter endo-lysosomal functions therefore potentially regulating  
177 clearance of A $\beta$  peptide. To address this, we used an approach based on antibody-  
178 based affinity purification of native P2X4 receptors, followed by mass spectrometry to  
179 identify potential P2X4 partners involved in endo-lysosomal functions. To enrich  
180 specifically intracellular membrane compartments (i.e. endosome and lysosome) an  
181 ultracentrifugation step was performed after membrane protein solubilization (see  
182 methods section). Affinity purification was performed on bone marrow derived  
183 macrophages (BMDM) from both WT and P2X4<sup>-/-</sup> mice. Among the different proteins  
184 interacting specifically with P2X4, ApoE was the only one with significant coverage  
185 found across two independent experiments (**sup. fig. 2**). In BMDM, P2X4-ApoE  
186 interaction was further confirmed by immunoprecipitation using either P2X4 or ApoE  
187 antibodies (**fig 4A, B**).

188 Immunocytochemistry revealed that in BMDM, P2X4-ApoE interaction is localized in  
189 intracellular compartments, likely from the endo-lysosomal pathways. This was further  
190 demonstrated by the co-localization of P2X4 and ApoE with CD68, a specific marker  
191 of the endo-lysosomal pathway (**fig. 4C**). The intracellular interaction between P2X4  
192 and ApoE is consistent with the known presence of P2X4 in lysosomes. We thus  
193 investigated whether P2X4 could mediate the trafficking of ApoE to lysosome and  
194 contribute to its degradation. To that aim, we compared the expression of ApoE in  
195 BMDM from WT and P2X4-deficient mice by western blotting. Because ApoE is  
196 secreted by BMDM, amounts of ApoE was determined both in cell lysates and cell  
197 culture supernatants. As shown in **figure 4D, E**, BMDM from KO mice express much  
198 higher levels of ApoE in both cell lysates and supernatants. Compared to normalized  
199 WT values, levels of ApoE in KO BMDM were  $4.7 \pm 1.5$  and  $6.8 \pm 1.4$  fold higher in  
200 lysate and supernatant, respectively. Non-normalized data show the same results but  
201 with higher variability (**sup. fig. 3**). Essentially identical results were obtained in the  
202 lysate of primary culture of microglia from WT and KO mice (**sup. fig. 4**). RT-qPCR  
203 transcriptional analysis of ApoE mRNA from WT and KO BMDM did not reveal any  
204 difference (**sup fig. 5**) further supporting that the physical interaction between P2X4  
205 and ApoE results in its degradation, likely through the lysosomal pathway. These  
206 effects of P2X4 on ApoE were reproduced in transfected COS-7 cells. Co-transfected



207 cells show clear intracellular co-localization of P2X4 and ApoE (**fig. 5A**). As observed  
208 in BMDM, P2X4/ApoE co-transfected COS-7 cells presented significant lower amounts  
209 of ApoE in both lysates and supernatant compared to cells transfected with ApoE alone  
210 (**fig. 5B, C**).

211 We next examine whether others P2X receptor subunits could modulate ApoE levels.  
212 To address this question, ApoE contents were analyzed as above in COS-7 cells  
213 expressing ApoE alone or co-transfected with either P2X4 or P2X2. As shown in **fig.**  
214 **5D, E**, as expected, co-expression of ApoE and P2X4 induced a reduction of both  
215 cellular and secreted ApoE as compared to cells expressing ApoE alone ( $0.95 \pm 0.3$   
216 vs  $1.34 \pm 0.3$ ) while co-expression of ApoE and P2X2 did not alter ApoE levels ( $1.18$   
217  $\pm 0.24$  vs  $1.34 \pm 0.3$ , unnormalized values).

218 Finally, we ask whether P2X4-mediated ApoE downregulation was dependent on its  
219 channel activity. As above, levels of ApoE were measured in lysates and supernatants  
220 from COS-7 cells expressing ApoE alone or co-transfected with either P2X4 or P2X4-  
221 K69A, a mutant form of the receptor unable to bind ATP. As shown in **figure 5F, G**,  
222 levels of ApoE were the same in cells transfected with P2X4 or P2X4-K69A, but  
223 significantly lower than in cells expressing ApoE alone. These results suggest that  
224 P2X4 receptor activity is not necessary to drive down regulation of ApoE and are  
225 consistent with an intracellular mechanism.

226

### 227 ***P2X4 induces cathepsin B activity***

228 A potential explanation for the higher amount of ApoE in P2X4 deficient myeloid cells  
229 is that ApoE, through its interaction with P2X4, is trafficked to lysosomes where it is  
230 degraded. To test this hypothesis, we used the E64 compound, a known inhibitor of  
231 lysosomal proteases. WT and KO BMDM were incubated overnight with 10  $\mu$ M E64,  
232 and levels of secreted and cellular ApoE were evaluated by western blotting. As shown  
233 on **fig. 6A and B**, in WT BMDM, E64 treatment strongly increased amounts of  
234 intracellular ApoE compared to untreated cells ( $0.44 \pm 0.1$  vs  $0.23 \pm 0.1$ , unnormalized  
235 values). In KO cells, E64 treatment had no effect on ApoE ( $0.92 \pm 0.4$  vs  $0.81 \pm 0.3$ ).  
236 E64 is a broad-spectrum cysteine protease inhibitor which targets many different  
237 proteases either cytoplasmic or lysosomal. We therefore tested more specific inhibitors  
238 of cysteine proteases. We first evaluated the potential involvement of calpains, a family  
239 of mostly cytoplasmic proteases. Overnight pre-treatment of WT and P2X4-deficient  
240 BMDM with 10  $\mu$ M calpain inhibitor III (CI-III), which targets calpains I and II, did not



241 induced any significant change in ApoE amounts in either group (WT:  $0.42 \pm 0.2$  vs CI-  
242 III :  $0.43 \pm 0.2$  ; P2X4KO :  $1.1 \pm 0.5$  vs CI-III :  $1.57 \pm 0.7$ ) (**sup fig. 6A, B**). These results  
243 were confirmed using Suc-Leu-Leu-Val-Tyr-AMC, a fluorescent substrate of calpain.  
244 Incubation of BMDM with 100 $\mu$ M Suc-Leu-Leu-Val-Tyr-AMC showed no difference in  
245 fluorescence signal between genotypes (**sup fig. 6C**). These results indicate that  
246 calpains were not involved in ApoE degradation.

247 We next tested whether cathepsin B (CatB), a cysteine protease highly expressed in  
248 lysosome, could be involved in ApoE degradation<sup>32</sup>. Pre-incubation of WT BMDM with  
249 20  $\mu$ M of CatB inhibitor overnight strongly enhanced amounts of ApoE ( $0.15 \pm 0.1$  vs  
250  $0.40 \pm 0.2$ , unnormalized values) while having no effect on P2X4-deficient BMDM ( $0.44$   
251  $\pm 0.2$  vs  $0.46 \pm 0.1$ , unnormalized values) (**fig. 6C, D**). No effect was observed using  
252 specific cathepsin L or cathepsin S inhibitors (data not shown). Triple immunostaining  
253 of P2X4, CD68 and CatB revealed a strong co-localization of the three proteins,  
254 indicating that P2X4 and CatB are both present in lysosome (**fig. 6E**). A similar co-  
255 localization was observed for P2X4, CatB and ApoE (**fig. 6F**). Specificity of the CatB  
256 antibody was verified by immunostaining and western blot in CatB-deficient BMDM  
257 (**sup. fig. 7A, B**). We analyzed whether P2X4 deletion could alter the enzymatic  
258 activity of CatB. We first measured CatB activity using the specific CatB substrate ZZ-  
259 RR-AMC, which becomes fluorescent upon cleavage. WT and P2X4-deficient BMDM  
260 cells were incubated with 100  $\mu$ M substrate for one and two hours and end point  
261 fluorescence was measured. As shown in **fig. 6G**, fluorescence was significantly  
262 higher in WT cells compared to P2X4-deficient BMDM, suggesting that CatB activity is  
263 reduced in these cells. These results were further confirmed with Magic Red assay, a  
264 cell-permeant CatB substrate whose fluorescence increases upon cleavage. **Fig. 6H,**  
265 **I** show that after incubation with Magic Red substrate, fluorescence was higher in WT  
266 compared to KO cells ( $47301 \pm 9238$  vs  $19969 \pm 2357$  respectively, fluorescence  
267 arbitrary units). This lower CatB activity in P2X4-deleted cells was not due to an  
268 impaired expression of the enzyme since both WT and P2X4-deficient cells display  
269 similar amounts of CatB (**sup. fig. 7C**). Following our hypothesis that CatB controls  
270 the degradation of ApoE, we tested whether in BMDM from CatB-deficient mice would  
271 express higher level of ApoE. As shown in **sup. fig. 8**, a higher amount of ApoE in  
272 CatB-deficient BMDM compare to WT was observed.

273

274 ***P2X4 regulates ApoE degradation in APP/PS1 mice***

275 We next investigated whether in APP/PS1 mice, microglial P2X4 is also prone to  
276 regulate ApoE degradation as demonstrated *in vitro*. First, we analyzed localization of  
277 ApoE and P2X4 in 12-months old APP/PS1 mice. Triple cortical co-immunostaining of  
278 ApoE, P2X4 and Iba1 revealed that P2X4 co-localizes with ApoE in microglia that are  
279 clustered around plaques (**fig. 7A**), furthermore in microglia P2X4 co-localizes with  
280 CD68+ vesicles (**fig. 7B**).

281 We also quantified ApoE from FACS-purified CD11b+ microglia from APP/PS1 and  
282 APP/PS1xKO mice by western blot (**fig. 7C, D, E**). Confirming previous *in vitro*  
283 findings, results show that the amount of ApoE was increased in purified microglia from  
284 APP/PS1xKO compared to APP/PS1 ( $0.36 \pm 0.001$  vs  $0.13 \pm 0.02$ , respectively).  
285 Finally, a clear co-localization of amyloid plaques, ApoE and Iba1 was also observed  
286 in brain of AD patient whereas in control brain, ApoE staining was almost slighter (**fig.**  
287 **7F**), suggesting that in human AD brain, P2X4 could also regulate ApoE degradation.  
288 Altogether, our results indicate that microglial P2X4 receptors, independently of their  
289 pore activity, are involved in ApoE degradation by promoting the activity of lysosomal  
290 cathepsin B activity.

291

292

## 293 **Discussion**

294 P2X receptors expression is up-regulated in reactive microglia associated with diverse  
295 neuropathological conditions such as neuropathic pain, *status epilepticus* or multiple  
296 sclerosis<sup>22</sup>. P2X4 activation in reactive microglia generally promotes deleterious  
297 effects such as hyperexcitability or inflammation<sup>33</sup>. Yet, in multiple sclerosis, P2X4  
298 expression has beneficial effect by increasing myelin phagocytosis and favoring  
299 remyelination<sup>34</sup>. In this study, we investigated to what extend P2X4 contributes to  
300 microglial functions in Alzheimer's disease.

301 By inactivating *p2x4* gene in APP/PS1 mice, we found that cognitive deficits associated  
302 with the APP/PS1 genotype were reversed to what is observed in wild type mice. This  
303 was associated with a reduction of soluble A $\beta$  peptide while there was no major  
304 difference in plaque load. Using a proteomic approach, we identified a specific  
305 interaction between ApoE and P2X4 in macrophages and further demonstrated that  
306 this interaction leads to a cathepsin B-dependent degradation of ApoE. In brain of  
307 APP/PS1 mice, P2X4 receptors are specifically expressed in so-called disease-  
308 associated microglia, a subpopulation of reactive microglia clustered at the vicinity of

309 amyloid plaques, where they co-localize with ApoE. A similar pattern of expression  
310 was also found in post mortem human brain from AD patients. Altogether, our results  
311 support a role for P2X4 to promote microglial ApoE degradation which leads to sA $\beta$   
312 accumulation in brain parenchyma and contributes to memory deficit in APP/PS1 mice.

313

### 314 ***p2rx4* deletion reverses cognitive performance decline in APP/PS1 mice**

315 We used both spatial memory as measured in water-maze learning and topographic  
316 memory in the Hamlet test, a recent behavioral device previously shown to measure  
317 spatio-temporal disorientation in mice<sup>29</sup>. In this test, APP/PS1 mice show a strong deficit  
318 to find the drinking house, a deficit which is no longer present in APP/PS1xP2X4<sup>-/-</sup>.  
319 *p2rx4* deletion has been linked to alteration of synaptic plasticity, which could result in  
320 spatial memory deficit<sup>35</sup>. However, our data supported that, in both the Hamlet test and  
321 water maze test, P2X4 deficient mice do not show learning impairment nor retention  
322 deficit. If some cognitive deficits have been reported in P2X4<sup>-/-</sup> mice, these deficits  
323 relate to socio-communicative and sensorimotor impairments rather than to memory  
324 performance<sup>36</sup>.

325 In physiological conditions, P2X4 is expressed at low level in different neuronal  
326 populations throughout the brain, but absent from microglial cells<sup>24</sup>. In pathological  
327 conditions, P2X4 is expressed *de novo* in reactive microglia where it contributes to  
328 BDNF release, network excitability and inflammatory response<sup>25,37</sup>. In 9 months old  
329 APP/PS1 mice our data clearly show a strong expression of P2X4 in reactive plaque-  
330 associated microglia (PAM), while in aged match control mice, the expression of the  
331 receptor is barely detectable in brain parenchyma. Increased expression of P2X4 in  
332 PAM is supported by recent transcriptomic data which show that in laser captured  
333 plaque associated microglia, *p2rx4* is expressed more than 4-fold compared to  
334 microglia from the parenchyma, away from any visible plaque (Hemonnot et al.,  
335 submitted). Although we cannot exclude a contribution of neuronal P2X4 receptor, our  
336 observations that (i) the receptor is highly expressed in PAM microglia and, (ii) its  
337 deletion reverse cognitive deficits of APP/PS1 mice but not in WT mice strongly  
338 support that microglial P2X4 receptor directly contributes to topographic and spatial  
339 memory alterations in AD mice.

340 Our results show that P2X4 deletion in APP/PS1 mice does not significantly change  
341 the number of amyloid plaques, nor the number of microglia in the parenchyma. Yet in  
342 APP/PS1xKO the amount of hippocampal soluble A $\beta$  was significantly reduced

343 compared to APP/PS1 mice in both western blot and ELISA experiments, while  
344 insoluble fraction was not different between the two genotypes (not shown). There are  
345 compelling evidence that toxic soluble low molecular-weight amyloid-beta  $\beta$  oligomers  
346 directly induce synaptic deficit leading to a reduction of learning capacities<sup>38</sup>. The  
347 reduction of the amount of sA $\beta$  observed in APP/PS1xKO could explain their better  
348 cognitive performances compared to APP/PS1 mice. Western blot analysis of synaptic  
349 proteins in APP/PS1 confirm a reduction of both NR1A and PSD95 relative to WT mice.  
350 However, a similar reduction was also observed for P2X4 deficient mice and  
351 APP/PS1xKO (not shown). One interpretation for this discrepancy is that the reduced  
352 level of sA $\beta$  observed in APP/PS1xKO may be sufficient to restore synaptic efficiency  
353 independently of synaptic structural changes, e.g. by directly regulating neuronal  
354 excitability alterations associated with A $\beta$  peptide deposit<sup>39</sup>.

355

#### 356 ***P2X4 interact with ApoE and mediates its degradation***

357 P2X4 receptors trafficking is tightly regulated and is mainly located in the  
358 endosomal/lysosomal network, which structural dysregulation in AD could promote  
359 abnormal APP processing<sup>40</sup>. Using a proteomic strategy based on intracellular  
360 organelle enrichment<sup>41,42</sup>, we identified ApoE as a specific P2X4 interacting protein in  
361 myeloid cells. Both proteins colocalize in intracellular CD68 positive compartments,  
362 likely endo-lysosome. Deletion of *p2x4* results in higher amounts of intracellular and  
363 secreted ApoE supporting that P2X4 drives CatB-dependent ApoE degradation. This  
364 interpretation is based on the observation that i) in P2X4 deficient macrophages and  
365 microglia, ApoE levels are increased compared to WT, independently of any  
366 transcriptional alteration, ii) inhibition of CatB enhances extracellular amounts of ApoE,  
367 an effect that is not observed in P2X4 deficient cells, iii) CatB activity is reduced in  
368 P2X4-deficient cells. Surprisingly, in recombinant system, introducing a binding site  
369 blocking mutation in P2X4 does not alter ApoE degradation, suggesting that P2X4  
370 activity is not required. However, we cannot rule out an activity-dependent mechanism.  
371 Indeed, in the endo-lysosomal pathway ATP-binding region of P2X4 faces the  
372 organelle's lumen and high ATP concentrations and acidic pH reduces P2X4 affinity  
373 for ATP<sup>40</sup>, it is conceivable that millimolar concentration of ATP in lysosome can trigger  
374 channel activity. Alternatively, alkalization of lysosome may lead to P2X4 activation  
375 as previously shown, however such an activation would also lead to decrease CatB  
376 activity, which *in fine* would reduce ApoE degradation. Finally, using the fluorescent

377 Lysosensor<sup>TM</sup>, we did not observed any variation of intra-lysosomal pH in P2X4-  
378 deficient cells, further supporting that regulation of CatB activity by P2X4 is  
379 independent of pH variation. Yet, in the context of AD where dysregulation of lysosomal  
380 pH is well documented<sup>43</sup>, we cannot exclude that an activity of lysosomal P2X4 due to  
381 defective lysosomal acidification, could contribute somehow to ApoE degradation.  
382 A key feature of P2X4 is its *de novo* expression in reactive microglia in diverse  
383 pathological conditions. Here, we show that in APP/PS1 mice, P2X4 is almost  
384 exclusively expressed in plaque associated microglia, but not in parenchymal  
385 microglial away from plaques nor in neurons. It is likely that P2X4 belongs to the so-  
386 called Disease Associated Microglia (DAM)<sup>28</sup>, a specific microglial population that is  
387 characterized by the specific expression of subset of genes, including several known  
388 AD risk factor such as Trem2 and ApoE. Indeed our data show a strong co-localization  
389 of P2X4 and ApoE in plaque associated microglia, in both mice and human AD  
390 patients, while in a recent study using mass spectrometry to identify deregulated  
391 proteins in microglia, an increase of P2X4 was observed in two mouse models of AD  
392 (APP/PS1 and APP-NL-G-F)<sup>44</sup>. While a clear *de novo* P2X4 protein expression is  
393 observed in reactive microglia, *p2rx4* gene has not been identified as deregulated in  
394 the various high throughput single cell genomics studies of reactive microglia. We  
395 made a similar observation in our previous transcriptomic analysis of reactive microglia  
396 in a model of sepsis<sup>45</sup>. This discrepancy between protein and RNA might be due to a  
397 translational regulation of P2X4 mRNA as previously suggested<sup>46</sup>.

398

### 399 ***Role for microglial P2X4 /ApoE in AD***

400 Our results show that in AD mouse brain, P2X4 is specifically expressed in microglia  
401 clustered around plaque that also express ApoE. P2X4 deficiency results in a  
402 significantly higher level of microglial ApoE, and presumably of its secreted form. P2X4  
403 deficiency also leads to lower the amount of sA $\beta$ . A great wealth of studies support a  
404 direct role of ApoE on sA $\beta$  clearance<sup>47</sup>. It is surprising to observe that elevated levels  
405 of microglial ApoE correlates with reduced sA $\beta$  and better cognitive performance in  
406 APP/PS1xP2X4KO mice. Indeed, mouse ApoE is thought to be amylogenic since  
407 global knock-out of *ApoE* results is dramatic reduction of A $\beta$  peptide deposition, even  
408 though deletion of *ApoE* show opposite effect on A $\beta$  deposition depending on the type  
409 of APP overexpressing mice model used<sup>48-50</sup>. However, a recent study demonstrated  
410 that microglial-specific inactivation of ApoE, beside a slight increase of average plaque



411 size, has only limited repercussion of amyloid burden in the 5xFAD model<sup>51</sup>. Yet,  
412 microglial *apoe* deletion results in an age-dependent reduction of the synaptic markers  
413 PSD95 and synaptophysin, regardless of 5xFAD genotype. Of note, global *apoe*  
414 deletion promotes neuritic dystrophy<sup>52</sup>. Our results show that deletion of P2X4  
415 increases microglial ApoE, reduces sA $\beta$  and reverses cognitive deficits, further  
416 supporting a minimal role of microglial ApoE in amyloid plaque formation but a potential  
417 protective function toward synapses. Although our results do not allow to directly link  
418 increased levels of microglial ApoE in P2X4 deficient mice to the reduction of sA $\beta$  or  
419 to the attenuation of the cognitive dysfunctions, the upregulation of P2X4 receptors in  
420 plaque associated microglia is likely involved in the development of AD behavioral  
421 deficits, probably by promoting ApoE degradation.

422 In human post mortem AD brain, we observed a similar distribution of P2X4, microglia  
423 and ApoE around amyloid plaques than in APP/PS1 mouse brain. This suggest that  
424 P2X4 could play similar functions in the human pathology, although AD mice models  
425 only partially recapitulate the human disease and mouse and human ApoE differently  
426 contribute to the disease<sup>47</sup>. Further experiments will be necessary to investigate this  
427 possibility.

428 Our data further support an important contribution of microglial P2X4 receptor to brain  
429 pathologies such as neuropathic pain, epilepsy or stroke. They also underline a  
430 potential protective function of microglial ApoE toward neurons cognitive  
431 performances.

432

433

## 434 **Methods**

435

### 436 **Animals**

437 Mice carrying a targeted null mutation of the P2RX4 gene were described elsewhere<sup>35</sup>.  
438 Briefly, a *E. Coli*  $\beta$ -galactosidase (LacZ)-neomycin cassette was inserted in place of  
439 the first coding exon of the P2RX4 gene. In the resulting allele, the P2RX4 promoter  
440 drives  $\beta$ -galactosidase expression. Chimeric mice were generated and crossed with  
441 C57BL/6 females to generate heterozygotes, which were then intercrossed to give rise  
442 to overtly healthy offspring in the expected Mendelian ratio. In the present study, mice  
443 were backcrossed for at least 20 generations and then maintained as separate P2RX4  
444 knockout (P2RX4<sup>-/-</sup>) and wild-type (P2RX4<sup>+/+</sup>) lines. All experiments followed



445 European Union (Council directive 86/609EEC) and institutional guidelines for  
446 laboratory animal care and use. Institutional license for hosting animals was approved  
447 by the French Ministry of Agriculture (No. D34-172-13). The  
448 Tg(APP<sup>swe</sup>,PSEN1<sup>dE9</sup>)85Dbo mice<sup>53</sup> (APP/PS1) were obtained from the Jackson  
449 Laboratory (JAX stock #034832) and bred as heterozygotes to C56 Bl6/J or P2X4<sup>-/-</sup>  
450 mice. All experiments using APP/PS1 and APP/PS1xP2X4<sup>-/-</sup> mice were carried out at  
451 12 months of age.

452

### 453 **Behavioral experiments**

454 *Hamlet test*. The Hamlet test was performed as previously described<sup>29,30</sup>. Briefly, the  
455 device consisted of a 1.6 m diameter apparatus with an agora in the center and five  
456 corridors expanding toward different compartments, called houses. Each house has a  
457 different interest: drink, eat, run, hide or interact with a stranger mouse. Mice were  
458 trained in group and were allowed to go freely in the apparatus for 4 h per day during  
459 12 days. Probe tests were performed 72 h and 96 h after the last training day, in water  
460 deprived or non-water deprived conditions, respectively. For water deprived condition,  
461 water bottles were removed from mice housing cages 15 h before the test. Mice were  
462 placed in the agora for 10 min and exploratory behaviors were video-tracked and  
463 analyzed with the Viewpoint software as latency time and number of errors to go to the  
464 drink house.

465 *Morris water maze*. The Morris water maze test was performed in a 1.4 m diameter (40  
466 cm height) circular tank with extra maze cues. Tank was filled with 22°C water  
467 containing non-toxic lime carbonate to make it opaque. A 10 cm diameter circular  
468 platform was immersed under water, thus not visible to mice. Mice were trained three  
469 times a day for six consecutive days. They were allowed a free 90 s swim in order to  
470 find the platform. If by that time, mice did not find the platform, they were gently place  
471 on it and stayed there for 20 s. Probe test were performed 48 h after the last training  
472 day. The platform was removed and mice swam for 60 s. A video camera recorded the  
473 probe test and analysis was performed using the Viewpoint software.

474 *Locomotor activity*. Mice were place in a square open field box for 10 min. Viewpoint  
475 software tracked animals and calculated the distance travelled.

476

477 **Tissue preparation.** Mice were euthanized with Euthazol (300 mg/kg) and perfused  
478 with PBS. Brains were either collected and fixed in 4% PFA at 4°C overnight or stored  
479 at - 80°C.

480

481 **Cell culture and transfection.** COS-7 cells were cultured in Dulbecco's Modified  
482 Eagle (DMEM) + glutamaX buffer supplemented with 10% fetal bovine serum (FBS)  
483 and 1% Penicillin-Streptomycin, and kept at 37°C with 5% CO<sub>2</sub>. Before transfection,  
484 cells were plated at 70% confluence in 6-well plates. Transfection was carried out using  
485 Lipofectamine 2000 (ThermoFisher), with the following DNA amount: 150 ng ApoE,  
486 100 ng *p2rx4*, 100 ng *p2rx4K69A* and 100 ng *p2rx2*. Medium was changed for HBSS  
487 (Gibco, 14025092) 48 h after transfection and supernatants and cell extracts were  
488 collected the next day as described below.

489

490 **BMDM culture.** BMDM were obtained from mice femur and tibia bone marrow and  
491 cultured in 30% L929 cell media and 70% DMEM + glutamaX buffer, supplemented  
492 with 10% fetal bovine serum (FBS) and 1% Penicillin-Streptomycin. Cells were  
493 mechanically dissociated and plated and medium was changed every 3 days. BMDM  
494 from cathepsin B deficient mice<sup>54</sup> were kindly provided by Dr. Bénédicte Manoury  
495 (Hôpital Necker Enfants Malades, Paris).

496

497 **Pharmacological treatment.** Macrophages were plated in a 12-well plate at 10<sup>6</sup> cells  
498 per well and treated with 10 μM E64 (Tocris, 5208) or 20 μM Z-Phe-Ala-FMK  
499 cathepsin B inhibitor (Santa Cruz, sc3131) in HBSS overnight.

500

501 **Western blot.** For BMDM culture cells, supernatants were collected in Amicon column  
502 (Millipore, UFC5010BK) and centrifuged at 14000 *g* for 30 min at 4°C. Column fraction  
503 were then collected and constituted the supernatant fraction of our cells. Cells were  
504 homogenized in lysis buffer (100 mM NaCl, 20 mM HEPES, 5 mM EDTA, 1% IGEPAL  
505 containing protease inhibitors). For cortex samples, dissected cortices were  
506 mechanically homogenized in 1% Triton lysis buffer (100 mM NaCl, 20 mM HEPES, 5  
507 mM EDTA, 1% Triton X100 containing protease inhibitors) before homogenization on  
508 a wheel at 4°C for 1 h. Protein extracts were then centrifuged at 15000 *g* at 4°C for 10  
509 min. After measuring protein concentration using Bradford technique, LDS sample  
510 buffer and 10% β-mercapto-ethanol were added. Proteins were then separated by

511 reducing 4-12%, SDS-PAGE and transferred to a nitrocellulose membrane. The  
512 membrane was blocked with PBS with 0.1% Tween 20 (PBST) containing 5% non-fat  
513 dry milk overnight at 4°C. The membrane was then incubated overnight at 4°C with the  
514 indicated antibodies. After three washes in PBST, the membrane was then treated for  
515 45 min at room temperature with the appropriated HRP-conjugated secondary  
516 antibody: Proteins were visualized using an ECL+ detection kit (Amersham) and  
517 imaged using a Chemidoc Touch Imaging system (Biorad). Densitometry was  
518 analyzed using the ImageLab software.

519

520 **Human tissue.** Frozen brain samples from human tissue were obtained by the IHU-  
521 A-ICM-Neuro-CEB brain bank (Hôpital de la Pitié-Salpêtrière, Paris). For  
522 immunostaining, cortex slice arrived frozen and mounted on microscope slides.

523

524 **A $\beta$  ELISA.** Cortices were homogenized in Tris buffer (Tris 1M, pH 7.6-SDS 2%)  
525 containing protease and phosphatase inhibitors and 1mM AEBSF. Homogenates were  
526 then sonicated at 40 mV for 10 s and centrifuged at 13000 *g* for 30 min at 4°C.  
527 Supernatants were then collected and constituted the soluble fraction of the sample.  
528 Quantification of soluble A $\beta$  peptide was performed using an ELISA kit (Thermofisher,  
529 KHB3441).

530

531 **Immunostaining.** Tissues were cut using a vibratome into 40  $\mu$ m sections, rinsed with  
532 PBS and blocked with 10% goat serum diluted in a 0.1% Triton X100 solution for 2 h.  
533 Appropriate primary antibody was added overnight at 4°C. After rinsing, slices were  
534 incubated for 2 h with corresponding secondary antibody. Antibodies were diluted in  
535 PBS with 0.1% TritonX100. Amylo Glo (Biosensis, TR300-AG) was used for amyloid  
536 plaque staining according to the provided instructions. Briefly, before immunostaining,  
537 brain section were transferred in a 70% ethanol solution, rinsed with distilled water and  
538 incubated with Amylo Glo for 10 min. Before mounting, sections were incubated with  
539 1x True Black<sup>®</sup> (Biotium) to quench lipofuscin autofluorescence. After rinsing, sections  
540 were mounted with Fluorescent Mounting medium (Dako) and observed on an  
541 Axiolmager Z1 apotome (Zeiss).

542 BMDM cells were fixed in 1% PFA, washed and incubated with 10% goat or donkey  
543 serum in PBS containing 0,1% Triton X-100 for 30 min. Cells were then incubated with

544 primary antibodies for 2 h, washed and incubated with secondary antibodies for 1 h  
545 before mounting.

546 Human tissues were fixed with 4% PFA and incubated with 10% goat or donkey serum  
547 in PBS containing 0.1% Triton X-100. Primary antibodies were directly put on slides in  
548 PBS containing 0.1% Triton X-100 overnight. After washing three times in PBS, tissues  
549 were incubated with the secondary antibodies for 2 h.

550 **Amyloid plaque quantification.** Amyloid plaques size was quantified using  
551 Thioflavine T staining. Brain section were stained with 100 µg/mL Thioflavine T (Sigma  
552 T3516) for 15 min, rinsed with ethanol 70% for 5 min once and with PBS three times.  
553 Brain sections were mounted and images were acquired using a Zeiss AxioImager Z1  
554 microscope. Plaque size was quantified using the threshold function in ImageJ. Then  
555 frequency was calculated using the frequency function in Excel. For each animal, 5  
556 brains sections were analyzed.

557 **Microglia area quantification.** Brain sections were stained with AmyloGlo® and Iba1  
558 antibody in order to stained amyloid plaques and microglia. For quantification, fields  
559 containing plaques were randomly chosen; six fields per section, five sections per  
560 animals were acquired using a Zeiss AxioImager Z1 microscope. For each amyloid  
561 plaque, the field of interest analyzed is defined by a perimeter that is proportional to  
562 the plaque size: the perimeter is calculated with a radius equal to four time the radius  
563 of the amyloid plaque. The Iba1 area is quantified in the zone using the threshold  
564 function in ImageJ.

565  
566 **Primary and secondary antibodies.** The following antibodies were used: goat anti-  
567 ApoE (1:1000, Millipore AB947), goat anti-Cathepsin B (1:1000, R&D systems AF965),  
568 rabbit anti-P2X4 (1:200, Sigma, HPA039494), donkey anti-CD68 (1:300, Biorad,  
569 MCA1957A488T), mouse anti-6E10 (Biolegend SIG-39320-0200), mouse anti-tubulin  
570 (Sigma, T9026), rabbit anti-HA (Invitrogen 715500), rabbit anti-Iba1 (1:2000, Wako  
571 MNK4428), rat anti-P2X4 (1:200, kindly provided by Dr. Nolte<sup>55</sup>), donkey anti-rat-A594  
572 (1:500 Jackson Immunoresearch 712-586-150), donkey anti-goat-A488 (1:2000,  
573 Molecular probes A11055), donkey anti-rabbit-A557 (1:2000, R&D systems NL004),  
574 goat anti-rabbit-A488 (1:2000, Molecular probes A11034), horse anti-mouse-HRP

575 (1:2000, Cell signaling, 7076S), goat anti-rabbit-HRP (1:2000, Jackson, 111-035-144),  
576 donkey anti-goat-HRP (1:2000, Jackson, 705-035-003).

577

578 **Cathepsin B fluorescent activity.** BMDM were plated in a 96-well plate at  $10^5$  cells  
579 per well and incubated with  $100\mu\text{M}$  of the cathepsin B substrate Z-RR-AMC (Enzo,  
580 BML-P137) for 1h and 2h before reading fluorescence (ex 365, em 440) on a plate  
581 reader (Flexstation 3, Molecular Devices,). For cathepsin B activity assessment by  
582 microscopy, macrophages were plated in a 24-well plate containing cover slips and  
583 incubated with the Magic Red cathepsin B substrate (1/250) (Bio-Rad, ICT938) for 2h.  
584 Cells were then fixed and mean fluorescence intensity in cells was quantified using the  
585 ImageJ software.

586

587 **Membrane solubilization.** Plasma membrane-enriched protein fractions were  
588 prepared from freshly isolated mouse BMDM. BMDM were detached by cell scraping,  
589 counted, pelleted and homogenized in a solubilization buffer ( $0.32\text{M}$  sucrose,  $10\text{mM}$   
590 HEPES,  $2\text{mM}$  EDTA and complete protease inhibitor cocktail, pH 7.4) with 150 strokes  
591 of a Potter–Elvehjem homogenizer (Dominique Dutcher). The homogenates were  
592 centrifuged 20 min, at  $1000\text{ g}$  at  $4^\circ\text{C}$  to eliminate the debris and the supernatant was  
593 centrifuged 1 h at  $70000\text{ g}$  at  $4^\circ\text{C}$ . The supernatant was discarded and the resulting  
594 pellet was solubilized in a set of detergent buffers of variable stringency (Complexiolyte  
595 (Logopharm), CL48 was chosen for further experiments due to its physiological  
596 stringency and after analysis of its solubilization efficiency) supplemented with  
597 protease inhibitors (Roche) for 2 h at  $4^\circ\text{C}$ . Insolubilized material (pellet; particles  $> 336$   
598 S) was removed by centrifugation ( $30000\text{ g}$ , 18 min,  $4^\circ\text{C}$ ) leaving micelles with an  
599 estimated size (diameter) of up to  $75\text{ nm}$  in the supernatant.

600

601 **Purification of P2X4 receptor complex by immunoprecipitation and analysis by**  
602 **mass spectrometry.** Freshly prepared solubilized proteins were incubated o/n at  $4^\circ\text{C}$   
603 with affinity-purified rabbit anti-P2X4 antibodies (Alomone) cross-linked to magnetic  
604 beads (Dynabeads, Invitrogen). The flow through was discarded and the beads  
605 washed 5 times with wash buffer (CL48 diluted  $\frac{1}{4}$  in PBS and supplemented with  
606 complete protease inhibitor cocktail (Roche)) and sample buffer (Invitrogen) was  
607 added to separate the protein complexes from the beads. Eluates were shortly run on  
608 SDS/PAGE gels, Coomassie blue stained and sliced according to molecular mass.

609 Further treatments and tandem mass spectrometry was performed at the Harvard  
610 Medical School Taplin Biological Mass spectrometry facility, Boston, MA, USA.

611  
612 **Co-immunoprecipitation.** Experiments with BMDM were carried out with membrane-  
613 enriched protein fractions (see protocol above). COS-7 cells were homogenized in lysis  
614 buffer (100 mM NaCl, 20 mM Hepes, 5 mM EDTA, 1% NP-40 and complete protease  
615 inhibitor cocktail pH 7.4) 48 h after transfection. Lysates were clarified by  
616 centrifugation. Protein concentration of the lysates was determined using a protein  
617 assay kit (Bio-Rad) and were incubated on a rotating wheel with either specific  
618 antibodies crosslinked to magnetic beads (Dynabeads, Invitrogen) (rabbit anti-P2X4  
619 (Alomone Labs), rat anti-P2X4 (kind gift of F. Nolte (Universitätsklinikum Hamburg-  
620 Eppendorf)), goat anti-ApoE (Millipore)) or anti-HA beads (Santa-Cruz Biotechnology)  
621 for 4°C, o/n. After five washes in lysis buffer, bound proteins were eluted with sample  
622 buffer (Invitrogen).

623  
624 **Cytometry.** Mice were perfused with PBS and cortices were collected and dissociated  
625 using the Neural Tissue Dissociation Kit P (Miltenyi, 130-092-628) combined with the  
626 gentleMACS Octo Dissociator with heaters, as indicated by the supplier. After  
627 dissociation, myelin was removed using the Debris Removal Solution (Miltenyi, 130-  
628 109-398). Cells were then incubated with Fc bloc (1:100, BD Pharmigen 553142) for  
629 10 min on ice and stained with Cd11b-PE (BD Pharmigen, 557397) for 30 min on ice.  
630 Cells were first discriminated with size and granularity. Microglia were then sorted  
631 using a laser with a 561 nm excitation wavelength and a 582nm filter. Afterward, sorted  
632 microglia were homogenized as described above and used in western blot  
633 experiments.

634  
635 **Quantitative PCR analysis** Total RNA from macrophage cultures was extracted with  
636 RNeasy Mini Kit (Qiagen). A measure of 2 µg of total RNA were reverse transcribed  
637 using random hexamers and SuperScript III First-Strand synthesis System (Invitrogen)  
638 according to the manufacturer's instructions. Realtime PCR was performed by using  
639 SYBR Green dye detection according to the manufacturer's instruction (SYBR Green  
640 PCR Master Mix, Roche) on a LightCycler480 system. PCR reactions were performed  
641 in a 10 ml volume containing 2.5 ml of diluted RT product, 1 ml of forward and reverse  
642 primers and 5 ml of PCR master mix. Negative controls using non-reverse-transcribed



643 RNA were performed simultaneously. For each reaction, C<sub>q</sub> was determined using the  
644 2nd Derivative Max tool of LightCycler480 software. The relative ratios of specifically  
645 amplified cDNAs were calculated using the DC<sub>q</sub> method (Pfaffl, 2001). RNAs from  
646 three independent cultures were used. All experimental conditions were processed at  
647 the same time.

648  
649 **Measurement of lysosomal pH.** BMDM were plated on 96 well plates and incubated  
650 with Lysosensor™ (Invitrogen, L7545) at 3 μM for 3 min at 37°C. Cells were then rinsed  
651 with PBS twice. A calibration curve of the intensity fluorescence as a function of pH  
652 was made. In order to do so, after incubation with Lysosensor™, cells were incubated  
653 with determined pH solution for 10 min at 37°C. Fluorescence was determined using  
654 a plate reader Spark (Tecan) using 340 nm and 380 nm excitation wavelength. Then  
655 ratio between fluorescence intensity resulting from the 340 nm and 380 nm excitation  
656 were calculated and pH was determined using the calibration curve.

657  
658 **Statistics**  
659 Statistics tests were performed using the GraphPad Prism9 software. After checking  
660 that all parametric assumptions were met, data were analyzed using Student's or  
661 ANOVA test. When the assumptions were not met, Wilcoxon signed-rank or Kruskal-  
662 Wallis test were used. For pharmacological treatment, data were paired. For each  
663 graph, mean ± SEM are indicated.

## 664 665 **References**

- 666  
667 1. Deture, M. A. & Dickson, D. W. The neuropathological diagnosis of Alzheimer's  
668 disease. *Mol. Neurodegener.* **14**, 1–18 (2019).  
669 2. Schwabe, T., Srinivasan, K. & Rhinn, H. Shifting paradigms: The central role of  
670 microglia in Alzheimer's disease. *Neurobiol. Dis.* **143**, 104962 (2020).  
671 3. Sarlus, H., Heneka, M. T., Sarlus, H. & Heneka, M. T. Microglia in Alzheimer's  
672 disease Microglia in Alzheimer's disease. *J. Clin. Invest.* **127**, 3240–3249  
673 (2017).  
674 4. Leng, F. & Edison, P. Neuroinflammation and microglial activation in Alzheimer  
675 disease: where do we go from here? *Nat. Rev. Neurol.* **17**, 157–172 (2021).  
676 5. Hansen, D. V., Hanson, J. E. & Sheng, M. Microglia in Alzheimer's disease. *J.*

- 677 *Cell Biol.* **217**, 459–472 (2018).
- 678 6. Wolf, S. A., Boddeke, H. W. G. M. & Kettenmann, H. Microglia in Physiology  
679 and Disease. *Annu. Rev. Physiol.* **79**, 619–643 (2017).
- 680 7. Keren-Shaul, H. *et al.* A Unique Microglia Type Associated with Restricting  
681 Development of Alzheimer’s Disease. *Cell* **169**, 1276-1290.e17 (2017).
- 682 8. Chen, Y. & Colonna, M. Microglia in Alzheimer’s disease at single-cell level.  
683 Are there common patterns in humans and mice? *J. Exp. Med.* **218**, 1–10  
684 (2021).
- 685 9. Holtzman, D. M., Herz, J. & Bu, G. Apolipoprotein E and apolipoprotein E  
686 receptors: Normal biology and roles in Alzheimer disease. *Cold Spring Harb.*  
687 *Perspect. Med.* **2**, 1–24 (2012).
- 688 10. Verghese, P. B. *et al.* ApoE influences amyloid- $\beta$  (A $\beta$ ) clearance despite  
689 minimal apoE/A $\beta$  association in physiological conditions. *Proc. Natl. Acad. Sci.*  
690 *U. S. A.* **110**, (2013).
- 691 11. Garai, K., Verghese, P. B., Baban, B., Holtzman, D. M. & Frieden, C. The  
692 binding of apolipoprotein e to oligomers and fibrils of amyloid- $\beta$  alters the  
693 kinetics of amyloid aggregation. *Biochemistry* **53**, 6323–6331 (2014).
- 694 12. Deane, R. *et al.* apoE isoform-specific disruption of amyloid  $\beta$  peptide  
695 clearance from mouse brain. *J. Clin. Invest.* **118**, 4002–4013 (2008).
- 696 13. Zhao, N., Liu, C. C., Qiao, W. & Bu, G. Apolipoprotein E, Receptors, and  
697 Modulation of Alzheimer’s Disease. *Biol. Psychiatry* **83**, 347–357 (2018).
- 698 14. Shi, Y. & Holtzman, D. M. Interplay between innate immunity and Alzheimer  
699 disease: APOE and TREM2 in the spotlight. *Nat. Rev. Immunol.* **18**, 759–772  
700 (2018).
- 701 15. Krasemann, S. *et al.* The TREM2-APOE Pathway Drives the Transcriptional  
702 Phenotype of Dysfunctional Microglia in Neurodegenerative Diseases.  
703 *Immunity* **47**, 566-581.e9 (2017).
- 704 16. Parhizkar, S. *et al.* Loss of TREM2 function increases amyloid seeding but  
705 reduces plaque-associated ApoE. *Nat. Neurosci.* **22**, 191–204 (2019).
- 706 17. Färber, K. & Kettenmann, H. Purinergic signaling and microglia. *Pflügers Arch.*  
707 *- Eur. J. Physiol.* **452**, 615–621 (2006).
- 708 18. Haynes, S. E. *et al.* The P2Y<sub>12</sub> receptor regulates microglial activation by  
709 extracellular nucleotides. *Nat. Neurosci.* **9**, 1512–1519 (2006).
- 710 19. Tsuda, M. *et al.* P2X<sub>4</sub> receptors induced in spinal microglia gate tactile

- 711 allodynia after nerve injury. *Nature* **424**, 778–783 (2003).
- 712 20. Ulmann, L. *et al.* Up-regulation of P2X4 receptors in spinal microglia after  
713 peripheral nerve injury mediates BDNF release and neuropathic pain. *J.*  
714 *Neurosci.* **28**, 11263–11268 (2008).
- 715 21. Ulmann, L. *et al.* Involvement of P2X4 receptors in hippocampal microglial  
716 activation after status epilepticus. *Glia* **61**, 1306–1319 (2013).
- 717 22. Montilla, A., Mata, G. P., Matute, C. & Domercq, M. Contribution of p2x4  
718 receptors to cns function and pathophysiology. *Int. J. Mol. Sci.* **21**, 1–16 (2020).
- 719 23. Martin, E. *et al.* New role of P2X7 receptor in an Alzheimer’s disease mouse  
720 model. *Mol. Psychiatry* **24**, 108–125 (2019).
- 721 24. Xu, J. *et al.* P2X4 Receptor Reporter Mice: Sparse Brain Expression and  
722 Feeding-Related Presynaptic Facilitation in the Arcuate Nucleus. *J. Neurosci.*  
723 **36**, 8902–8920 (2016).
- 724 25. Ulmann, L. *et al.* Involvement of P2X4 receptors in hippocampal microglial  
725 activation after status epilepticus. *Glia* **61**, 1306–1319 (2013).
- 726 26. Lalisse, S. *et al.* Sensory neuronal P2RX4 receptors controls BDNF signaling  
727 in inflammatory pain. *Sci. Rep.* **8**, 964 (2018).
- 728 27. van Wageningen, T. A. *et al.* Exploring reported genes of microglia RNA-  
729 sequencing data: Uses and considerations. *Glia* **69**, 2933–2946 (2021).
- 730 28. Deczkowska, A. *et al.* Disease-Associated Microglia: A Universal Immune  
731 Sensor of Neurodegeneration. *Cell* **173**, 1073–1081 (2018).
- 732 29. Crouzier, L., Gilabert, D., Rossel, M., Trousse, F. & Maurice, T. Topographical  
733 memory analyzed in mice using the Hamlet test, a novel complex maze.  
734 *Neurobiol. Learn. Mem.* **149**, 118–134 (2018).
- 735 30. Crouzier, L. & Maurice, T. Assessment of Topographic Memory in Mice in a  
736 Complex Environment Using the Hamlet Test. *Curr. Protoc. Mouse Biol.* **8**, e43  
737 (2018).
- 738 31. Qureshi, O. S., Paramasivam, A., Yu, J. C. H. & Murrell-Lagnado, R. D.  
739 Regulation of P2X4 receptors by lysosomal targeting, glycan protection and  
740 exocytosis. *J. Cell Sci.* **120**, 3838–3849 (2007).
- 741 32. Ye, S. Q., Reardon, C. A. & Getz, G. S. Inhibition of apolipoprotein E  
742 degradation in a post-Golgi compartment by a cysteine protease inhibitor. *J.*  
743 *Biol. Chem.* **268**, 8497–8502 (1993).
- 744 33. Rassendren, F. F. & Audinat, E. Purinergic signaling in epilepsy. *J. Neurosci.*

- 745            *Res.* **94**, 781–793 (2016).
- 746    34.    Zabala, A. *et al.* P2X4 receptor controls microglia activation and favors  
747            remyelination in autoimmune encephalitis. *EMBO Mol. Med.* **10**, (2018).
- 748    35.    Sim, J. A. *et al.* Altered hippocampal synaptic potentiation in P2X4 knock-out  
749            mice. *J. Neurosci.* **26**, 9006–9009 (2006).
- 750    36.    Wyatt, L. R. *et al.* Sociocommunicative and sensorimotor impairments in male  
751            P2X4-deficient mice. *Neuropsychopharmacology* **38**, 1993–2002 (2013).
- 752    37.    Ulmann, L. *et al.* Up-Regulation of P2X4 Receptors in Spinal Microglia after  
753            Peripheral Nerve Injury Mediates BDNF Release and Neuropathic Pain. *J.*  
754            *Neurosci.* **28**, 11263–11268 (2008).
- 755    38.    Li, S. & Selkoe, D. J. A mechanistic hypothesis for the impairment of synaptic  
756            plasticity by soluble A $\beta$  oligomers from Alzheimer’s brain. *J. Neurochem.* **154**,  
757            583–597 (2020).
- 758    39.    Hector, A. & Brouillette, J. Hyperactivity Induced by Soluble Amyloid- $\beta$   
759            Oligomers in the Early Stages of Alzheimer’s Disease. *Front. Mol. Neurosci.*  
760            **13**, 1–15 (2021).
- 761    40.    Arbo, B. D., Cechinel, L. R., Palazzo, R. P. & Siqueira, I. R. Endosomal  
762            dysfunction impacts extracellular vesicle release: Central role in A $\beta$  pathology.  
763            *Ageing Res. Rev.* **58**, 101006 (2020).
- 764    41.    Berkefeld, H. *et al.* BKCa-Cav channel complexes mediate rapid and localized  
765            Ca<sup>2+</sup>-activated K<sup>+</sup> signaling. *Science (80-. )*. **314**, 615–620 (2006).
- 766    42.    Müller, C. S. *et al.* Quantitative proteomics of the Cav2 channel  
767            nanoenvironments in the mammalian brain. *Proc. Natl. Acad. Sci. U. S. A.* **107**,  
768            14950–14957 (2010).
- 769    43.    Lee, J. H. *et al.* Lysosomal proteolysis and autophagy require presenilin 1 and  
770            are disrupted by Alzheimer-related PS1 mutations. *Cell* **141**, 1146–1158  
771            (2010).
- 772    44.    Monasor, L. S. *et al.* Fibrillar A $\beta$  triggers microglial proteome alterations and  
773            dysfunction in Alzheimer mouse models. *bioRxiv* 1–33 (2019).  
774            doi:10.1101/861146
- 775    45.    Hirbec, H.; Roubert, C.; Richard, I.; Marmai, C.; Esclangon, A.; Didier, M.;  
776            Civic, N.; Peyroutou, R.; Boulpicante, M.; Rey, C.; Docquier, M.; Rassendren,  
777            F. Definition of the microglial activome from individual mice revealed by  
778            RNAseq. *Glia* **63**, E200–E201 (2015).

- 779 46. Sophocleous, R. A., Miles, N. A., Ooi, L. & Sluyter, R. P2y2 and p2x4 receptors  
780 mediate ca<sup>2+</sup> mobilization in dh82 canine macrophage cells. *Int. J. Mol. Sci.*  
781 **21**, 1–22 (2020).
- 782 47. Huynh, T. P. V., Davis, A. A., Ulrich, J. D. & Holtzman, D. M. Apolipoprotein E  
783 and Alzheimer’s disease: The influence of apolipoprotein E on amyloid- $\beta$  and  
784 other amyloidogenic proteins. *J. Lipid Res.* **58**, 824–836 (2017).
- 785 48. Bales, K. R. *et al.* Apolipoprotein E is essential for amyloid deposition in the  
786 APP(V717F) transgenic mouse model of Alzheimer’s disease. *Proc. Natl.*  
787 *Acad. Sci. U. S. A.* **96**, 15233–15238 (1999).
- 788 49. Holtzman, D. M. *et al.* Expression of human apolipoprotein E reduces amyloid- $\beta$   
789 deposition in a mouse model of Alzheimer’s disease. *J. Clin. Invest.* **103**,  
790 (1999).
- 791 50. Ulrich, J. D. *et al.* ApoE facilitates the microglial response to amyloid plaque  
792 pathology. *J. Exp. Med.* **215**, 1047–1058 (2018).
- 793 51. Henningfield, C. M., Arreola, M. A., Soni, N., Spangenberg, E. E. & Green, K.  
794 N. Microglia-specific ApoE knock-out does not alter Alzheimer’s disease plaque  
795 pathogenesis or gene expression. *Glia* **70**, 287–302 (2022).
- 796 52. Ji, Y. *et al.* Apolipoprotein E isoform-specific regulation of dendritic spine  
797 morphology in apolipoprotein E transgenic mice and Alzheimer’s disease  
798 patients. *Neuroscience* **122**, 305–315 (2003).
- 799 53. Jankowsky, J. L. *et al.* Mutant presenilins specifically elevate the levels of the  
800 42 residue  $\beta$ -amyloid peptide in vivo: Evidence for augmentation of a 42-  
801 specific  $\gamma$  secretase. *Hum. Mol. Genet.* **13**, 159–170 (2004).
- 802 54. Deussing, J. *et al.* Cathepsins B and D are dispensable for major  
803 histocompatibility complex class II-mediated antigen presentation. *Proc. Natl.*  
804 *Acad. Sci. U. S. A.* **95**, 4516–4521 (1998).
- 805 55. Bergmann, P. *et al.* Generation and Characterization of Specific Monoclonal  
806 Antibodies and Nanobodies Directed Against the ATP-Gated Channel P2X4.  
807 *Front. Cell. Neurosci.* **13**, (2019).

808

## 809 **Acknowledgements**

810 This work was supported by the Institut National de la Santé et de la Recherche  
811 Médicale (INSERM), the Centre National de la Recherche Scientifique (CNRS), “La  
812 fondation NRJ-Institut de France”. JH was supported by LabEx ICST Grant ANR-11-

813 LABX-0015. We thank Dr. H el ene Hirbec for her help with qPCR experiment.  
814 Experiments were performed with the help of the following Montpellier Biocampus core  
815 facilities: R eseau des Animaleries de Montpellier (RAM) (iexplore facility), the imaging  
816 facility MRI, member of the national infrastructure France-BioImaging infrastructure is  
817 supported by the French National Research Agency (ANR-10-INBS-04, «Investments  
818 for the future»). We also thank the CECEMA animal facility (University of Montpellier,  
819 France).

820

### 821 **Authors contribution**

822 F.R. and L.U. conceived the study. J.H., E.G.P, L.U., F.R designed experiments. J.H.,  
823 E.G.P, N.L., B.M., C.D. and L.U. performed experiments and analyzed data. F.R., L.U.  
824 and J.H wrote the manuscript with the input from all authors.

825

### 826 **Competing interests**

827 The authors declare no competing interests.

828

829

830

831

832

833

834

835

836

837

838

### 839 **Figure legends**

840

841 **Figure 1: P2X4 is specifically expressed in plaque associated microglia in both**  
842 **human and mice AD brain. (A)** Representative pictures of cortical brain slices from  
843 AD patients and healthy control labeled with AmyloGlo (blue, amyloid plaques), P2X4  
844 (green) and Iba1 (red). P2X4 staining co-localizes with Iba1 in regions of dense  
845 amyloid plaque staining, supporting that microglia clustered around amyloid deposit  
846 specifically express P2X. In healthy control brain, P2X4 staining does not co-localizes



847 with that of Iba1. Scale bar 20  $\mu\text{m}$ . **(B)** Representative low magnification picture of  
848 immunofluorescence showing P2X4 (red) and Iba1 (green) immunostaining in the  
849 cortex of 12 months APP/PS1 mice. Both P2X4 and Iba1 staining co-localize in spot  
850 corresponding to amyloid plaques. Scale bar 200  $\mu\text{m}$ . **(C)** High magnification of P2X4  
851 (red) Iba1 (green) immunostaining at the vicinity of amyloid plaques (Amylo Glo  
852 staining, blue) in the cortex of 12 APP/PS1 mice (*top*) and APP/PS1xKO mice (*bottom*).  
853 Note the specific intracellular localization of P2X4 in microglia clustered around  
854 amyloid deposit. Scale bar 20  $\mu\text{m}$ . **(D)** Representative immunofluorescence in  
855 APP/PS1 mice showing that parenchymal microglia (Iba1, green) do not express P2X4  
856 (red) in region with no amyloid deposit (Amylo Glo staining, blue). Scale bar 20  $\mu\text{m}$ .

857  
858 **Figure 2: *p2x4* deletion reverses memory deficit in APP/PS1 mice.** **(A)** *Left*,  
859 Latency to locate the drink house 15 h after water deprivation in the Hamlet test. WT  
860 and KO mice present reduced latency to the drink house, whereas no difference was  
861 observed between non-water deprived (NWD) and water-deprived (WD) conditions in  
862 APP/PS1 mice. APP/PS1xKO water deprived mice present significant reduction of the  
863 latency, indicating that mice have retained the location of the drink house. *Right*,  
864 Number of errors before entering the drink house. WT and KO mice present reduced  
865 number of errors, whereas no difference was observed between non-water and water-  
866 deprived condition in APP/PS1 mice. APP/PS1xKO deprived-water mice present  
867 significant reduction of the number of errors. N = 3 independent experiments, n = 8-11  
868 mice per group. \*  $p < 0.05$ , \*\*  $p < 0.01$ , Mann-Whitney test, WD vs NWD for each  
869 genotype.

870  
871 **Figure 3: Deletion of *p2x4* does not affect amyloid plaques density but reduces**  
872 **soluble A $\beta$  species.** **(A)** Representative images of Thioflavine T staining in APP/PS1  
873 and APP/PS1xKO brain. Scale bar 700  $\mu\text{m}$ . **(B)** Cumulative frequency of the range  
874 size of amyloid plaques. There is no obvious difference in the number of plaques not  
875 of their size between APP/PS1 and APP/PS1xKO; n = 11 mice per group. **(C and D)**  
876 Analysis of microglial clustering around amyloid plaque between in the cortex of  
877 APP/PS1 and APP/PS1xKO mice. **(C)** Representative image of microglia clustering  
878 around plaques. Amyloid plaques are stained in blue and Iba1 is in green. Scale bar  
879 20  $\mu\text{m}$ . **(D)** Quantification of the area covered by microglia surrounding amyloid  
880 plaques. The ratio of the surface occupied by microglia over the surface of the plaque

881 is expressed for both APP/PS1 and APP/PS1xKO mice. n = 11 mice per group,  
882 unpaired t-test. **(E)** Representative Western blot of A $\beta$  peptide detected with the 6E10  
883 antibody from cortex extracts from APP/PS1 and APP/PS1xKO mice. **(F)** Quantitative  
884 analysis of Western blots presented in (E). A significant decrease of the A $\beta$  peptide  
885 amount is observed in APP/PS1xKO mice. n = 7 mice per group, \* p<0.05, unpaired t-  
886 test. **(G)** ELISA quantification of soluble (right panel) and insoluble (left panel) A $\beta$ 1-42  
887 peptide in the cortex of APP/PS1 and APP/PS1xKO mice. A significant decrease of  
888 the concentration of sA $\beta$  is observed in APP/PS1xKO mice, compared to APP/PS1  
889 mice. Insoluble A $\beta$  peptide is unchanged between the two genotypes. N = 2  
890 independent experiments, n = 6-7 mice per group. \* p<0.05, unpaired t test.

891  
892 **Figure 4: P2X4 interacts with ApoE in BMDM endo-lysosomal compartments and**  
893 **reduces its amount compared to P2X4-deficient cells. (A, B).** Co-  
894 immunoprecipitation of P2X4 and ApoE. BMDM membrane extracts from WT and KO  
895 mice were immunoprecipitated (IP) with an anti-P2X4 antibody (A), or ApoE antibody  
896 (B). Immunoprecipitated proteins were separated by electrophoresis and  
897 immunoblotted with either anti-ApoE (top row) or anti-P2X4 (bottom row) antibodies.  
898 **(C)** Representative immunofluorescence image showing the co-localization of the  
899 lysosomal marker CD68 (green), P2X4 (red) and ApoE (purple) in BMDM cells. Scale  
900 bar 5  $\mu$ m. **(D, E)** Western blot analysis of ApoE in BMDM culture supernatants (Sup)  
901 or cell lysates (Lys) from WT and KO mice. (D) Representative western blot of ApoE,  
902 **(E)** Quantification of western blot presented in D. A significant increase of ApoE is  
903 observed in both KO cultures supernatants and in cell lysates. Results were  
904 normalized to ApoE signal obtained for WT BMDM in each culture. n = 6 independent  
905 cultures, \* p<0.05, unpaired t test.

906  
907 **Figure 5: Characterization of the interaction between P2X4 and ApoE in**  
908 **recombinant system.**

909 **(A)** Representative immunofluorescence of ApoE (green) and P2X4 (red), and DAPI  
910 (blue) in co-transfected COS-7 cells. Both ApoE and P2X4 co-localize in intracellular  
911 compartments. Scale bar 10  $\mu$ m. **(B, C)** Comparison of ApoE expression upon co-  
912 transfection with P2X4. COS-7 cells were transfected with ApoE alone or in  
913 combination with P2X4. Expression of ApoE was analyzed by Western blot in both cell

914 culture supernatants and cell lysates (B). Quantitative analysis shows that in the  
915 presence of P2X4, amounts of ApoE is reduced in both culture supernatant (Sup) and  
916 cell lysates (Lys) (C).  $n = 3$  independent experiments,  $** p < 0.01$ , One sample  $t$ -test  
917 compared to theoretical value of 1. **(D, E)** Comparison of ApoE expression upon co-  
918 transfection with P2X4 or P2X2. (D) Expression of ApoE was analyzed by Western blot  
919 in both cell culture supernatants and cell lysates (E) Quantitative analysis of ApoE in  
920 supernatant shows that co-expression with P2X4 reduces the expression of ApoE,  
921 whereas that of P2X2 has no effect.  $n = 6$  independent experiments,  $* p < 0.05$ , One  
922 sample Wilcoxon compared to theoretical value of 1. **(F, G)** P2X4 activity is not  
923 necessary to reduce ApoE levels. (F) Expression of ApoE was analyzed by Western  
924 blot in cell culture supernatants of cells transfected with ApoE alone or in combination  
925 of either P2X4 or P2X4-K69A, an ATP binding site dead mutant. (G) Quantitative  
926 analysis shows that both P2X4 and P2X4-K69A significantly reduces the ApoE levels  
927 to the same extend.  $n = 8$  independent experiments,  $** p < 0.01$ , one sample  $t$ -test  
928 compared to theoretical value of 1.

929

930 **Figure 6: P2X4 regulates cathepsin B-dependent ApoE degradation.**

931 **(A, B)** Comparison of treatment with E64 a pharmacological inhibitor of the cysteine  
932 proteases, on ApoE expression in BMDM culture of WT and P2X4<sup>-/-</sup> mice. (A)  
933 Representative western blot of ApoE in the supernatant of WT and P2X4<sup>-/-</sup> BMDM after  
934 incubation with 10  $\mu$ M E64. (B) Quantitative analysis of western blots shows that E64  
935 induced a strong increase of ApoE in the supernatant of WT but not in P2X4<sup>-/-</sup> BMDM.  
936  $n = 5$  independent experiments,  $** p < 0.01$ , One sample  $t$ -test compared to theoretical  
937 value of 1. **(C, D)** Comparison of treatment with 20  $\mu$ M Z-Phe-Ala-FMK, a CatB  
938 inhibitor, on ApoE expression in BMDM culture of WT and P2X4<sup>-/-</sup> mice. (C)  
939 Representative western blot of ApoE in the supernatant of WT and P2X4<sup>-/-</sup> BMDM after  
940 incubation with Z-Phe-Ala-FMK. (D) Quantitative analysis shows that inhibition of CatB  
941 with Z-Phe-Ala-FMK induces a strong increase of ApoE in the supernatant of WT but  
942 not in P2X4<sup>-/-</sup> BMDM.  $n = 6$  experiments,  $** p < 0.01$ , One sample  $t$ -test compared to  
943 theoretical value of 1. **(E, F)** Co-localization in BMDM of P2X4, ApoE and CatB in CD68  
944 positive compartments. (E) Representative picture of CD68 (green), P2X4 (red) and  
945 CatB (white) immunostaining in BMDM cells. Scale bar 5  $\mu$ m. (F) Representative  
946 immunostaining of ApoE (green), P2X4 (red) and CatB (white) in BMDM cells. Scale

947 bar 5  $\mu\text{m}$ . **(G, H, I)** P2X4 regulates CatB activity in BMDM. (G) CatB activity was  
948 measured using the cell-permeable fluorogenic CatB substrate Z-RR-AMC. After  
949 incubation with 100  $\mu\text{M}$  Z-RR-AMC, fluorescence was read at 1 h and 2 h. A significant  
950 increase of the signal is observed in WT macrophages between 1 h and 2 h, whereas  
951 the activity in KO cells remained unchanged.  $n = 8$  experiments,  $** p < 0.01$ , One sample  
952  $t$ -test compared to theoretical value of 1 WT(1 h) vs KO (1 h) and WT (1 h) vs WT(2  
953 h),  $\$ p < 0,05$  Kruskal-Wallis test WT(2 h) vs KO (2 h); KO (1 h) vs KO (2 h) is non-  
954 significant. (H) Representative microscopic image of cellular CatB activity in WT and  
955 P2X4<sup>-/-</sup> BMDM using the Magic red cathepsin B kit. A strong signal is observed in WT  
956 BMDM as compared to P2X4<sup>-/-</sup> cells. (I) Quantitative analysis of the magic Red  
957 fluorescence using ImageJ.  $* p < 0.05$ ,  $n = 3$  independent cultures, unpaired  $t$ -test. Scale  
958 bar 30  $\mu\text{m}$ .

959

960 **Figure 7: Increased ApoE in microglia from APP/PS1xKO mice and AD patients.**

961 **(A)** Immunofluorescence of ApoE (blue), Iba1 (green) and P2X4 (red) in APP/PS1 mice  
962 cortex. Scale bar 10  $\mu\text{m}$ . **(B)** Immunofluorescence of CD68 (red), Iba1 (green), P2X4  
963 (white) in APP/PS1 mice cortex. Scale bar 20  $\mu\text{m}$ . **(C, D, E)** Analysis of ApoE  
964 expression in FACS sorted microglia from APP/PS1 and APP/PS1xKO mice. (C)  
965 Microglia were sorted based on CD11b-PE positive selection. (D) Representative  
966 western blot of ApoE from APP/PS1 and APP/PS1xKO FACS-sorted cortical microglia.  
967 **(E)** Quantitative analysis of signals presented in C shows an increase in ApoE in  
968 APP/PS1xKO mice relative to APP/PS1 mice.  $N = 2$  independent experiments,  $n = 2$   
969 mice per group. **(F)** Representative pictures of cortical brain slices from healthy donor  
970 and AD patients labeled with AmyloGlo (blue, amyloid plaques), ApoE (green) and  
971 Iba1 (red) showing an increased expression of ApoE in human microglia clustered  
972 around amyloid deposit. Scale bar 20  $\mu\text{m}$ .

973

974

975

A

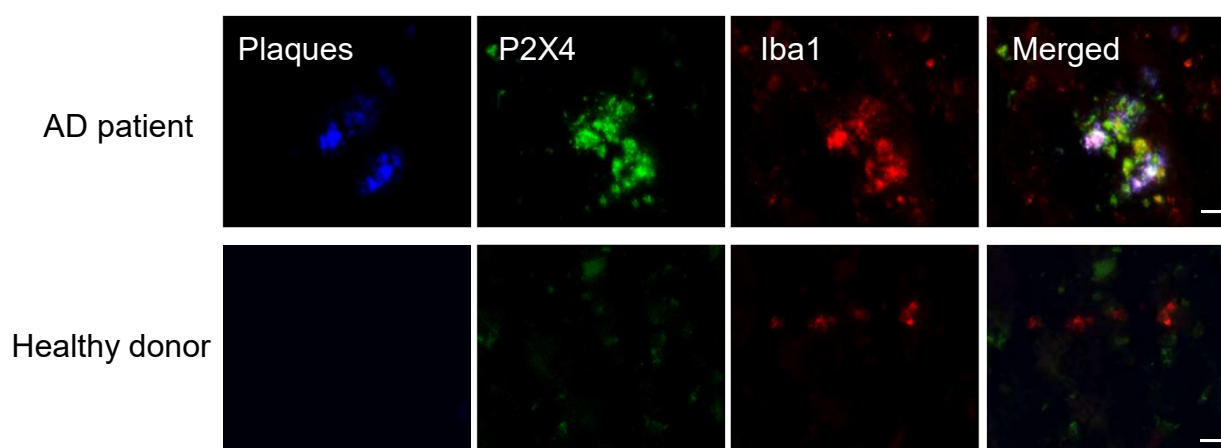

B

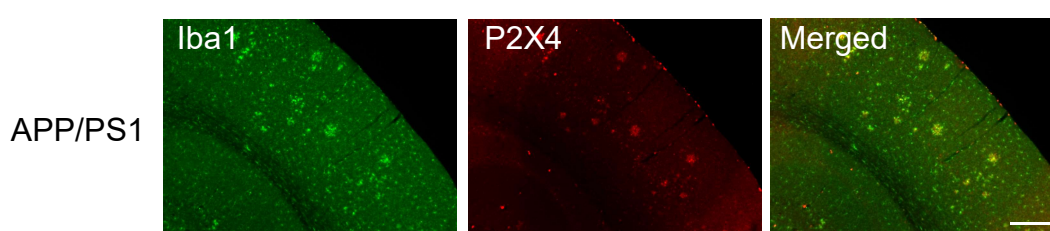

C

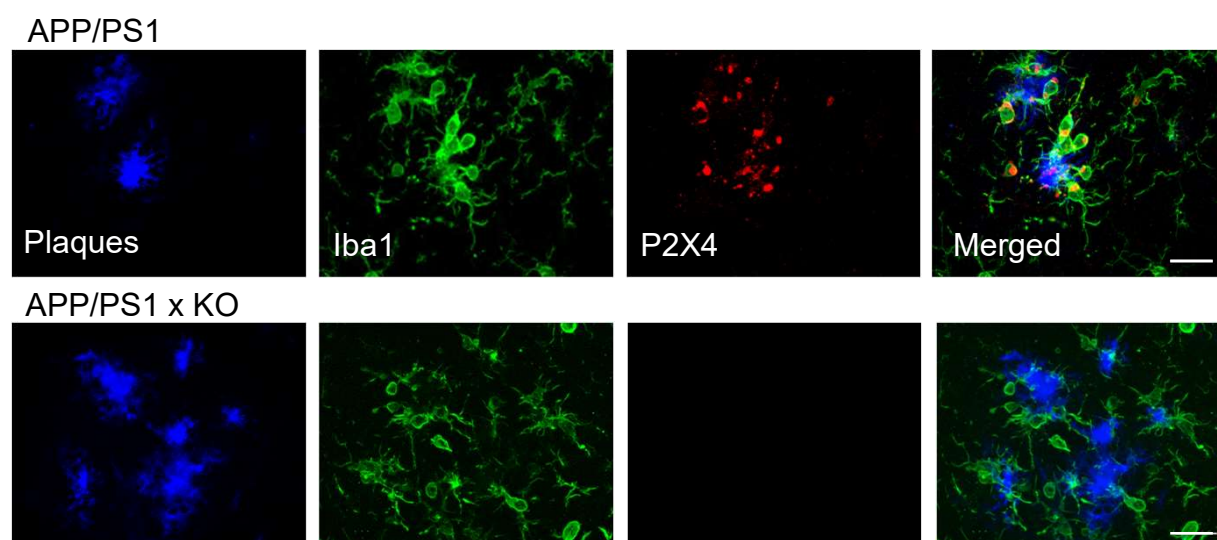

D

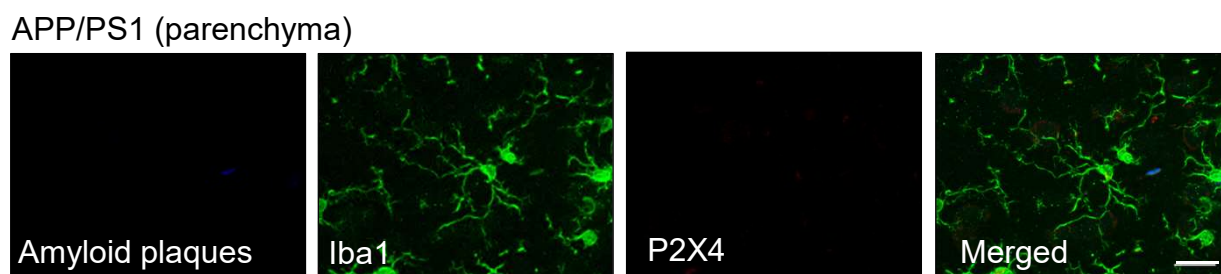

**Figure 1: P2X4 is specifically expressed in plaque associated microglia in both human and mice AD brain.** (A) Representative pictures of cortical brain slices from AD patients and healthy control labeled with AmyloGlo (blue, amyloid plaques), P2X4 (green) and Iba1 (red). P2X4 staining co-localizes with Iba1 in regions of dense amyloid plaque staining, supporting that microglia clustered around amyloid deposit specifically express P2X. In healthy control brain, P2X4 staining does not co-localizes with that of Iba1. Scale bar 20  $\mu$ m. (B) Representative low magnification picture of immunofluorescence showing P2X4 (red) and Iba1 (green) immunostaining in the cortex of 12 months APP/PS1 mice. Both P2X4 and Iba1 staining co-localize in spot corresponding to amyloid plaques. Scale bar 200  $\mu$ m. (C) High magnification of P2X4 (red) Iba1 (green) immunostaining at the vicinity of amyloid plaques (Amylo Glo staining, blue) in the cortex of 12 APP/PS1 mice (top) and APP/PS1xKO mice (bottom). Note the specific intracellular localization of P2X4 in microglia clustered around amyloid deposit. Scale bar 20  $\mu$ m. (D) Representative immunofluorescence in APP/PS1 mice showing that parenchymal microglia (Iba1, green) do not express P2X4 (red) in region with no amyloid deposit (Amylo Glo staining, blue). Scale bar 20  $\mu$ m.



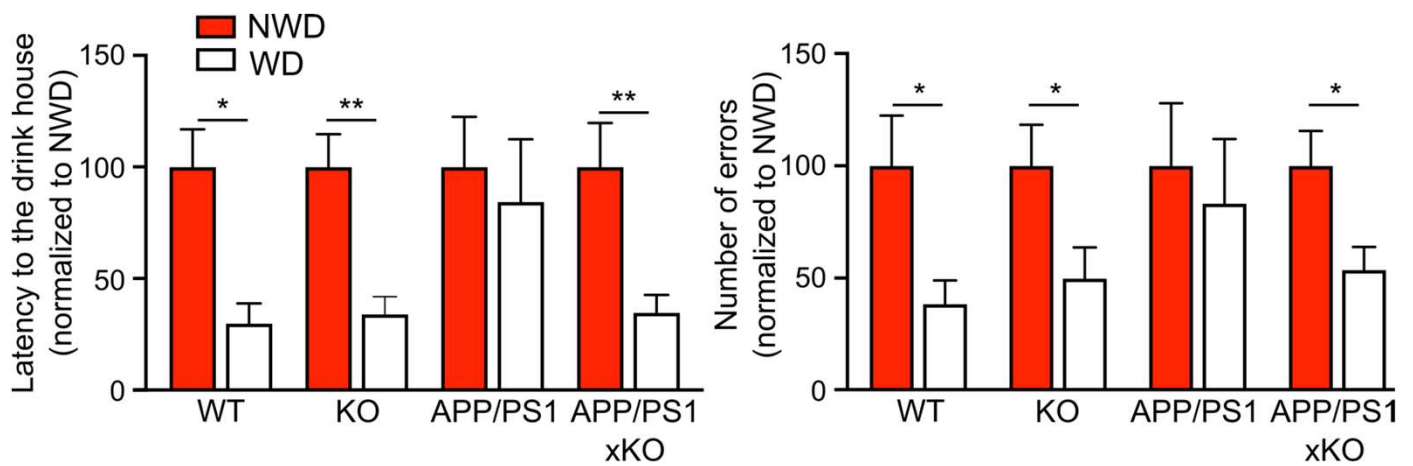

**Figure 2: *p2x4* deletion reverses memory deficit in APP/PS1 mice. (A) Left,** Latency to locate the drink house 15 h after water deprivation in the Hamlet test. WT and KO mice present reduced latency to the drink house, whereas no difference was observed between non-water deprived (NWD) and water-deprived (WD) conditions in APP/PS1 mice. APP/PS1xKO water deprived mice present significant reduction of the latency, indicating that mice have retained the location of the drink house. *Right,* Number of errors before entering the drink house. WT and KO mice present reduced number of errors, whereas no difference was observed between non-water and water-deprived condition in APP/PS1 mice. APP/PS1xKO deprived-water mice present significant reduction of the number of errors. N = 3 independent experiments, n = 8-11 mice per group. \* p<0.05, \*\* p<0.01, Mann-Whitney test, WD vs NWD for each genotype.



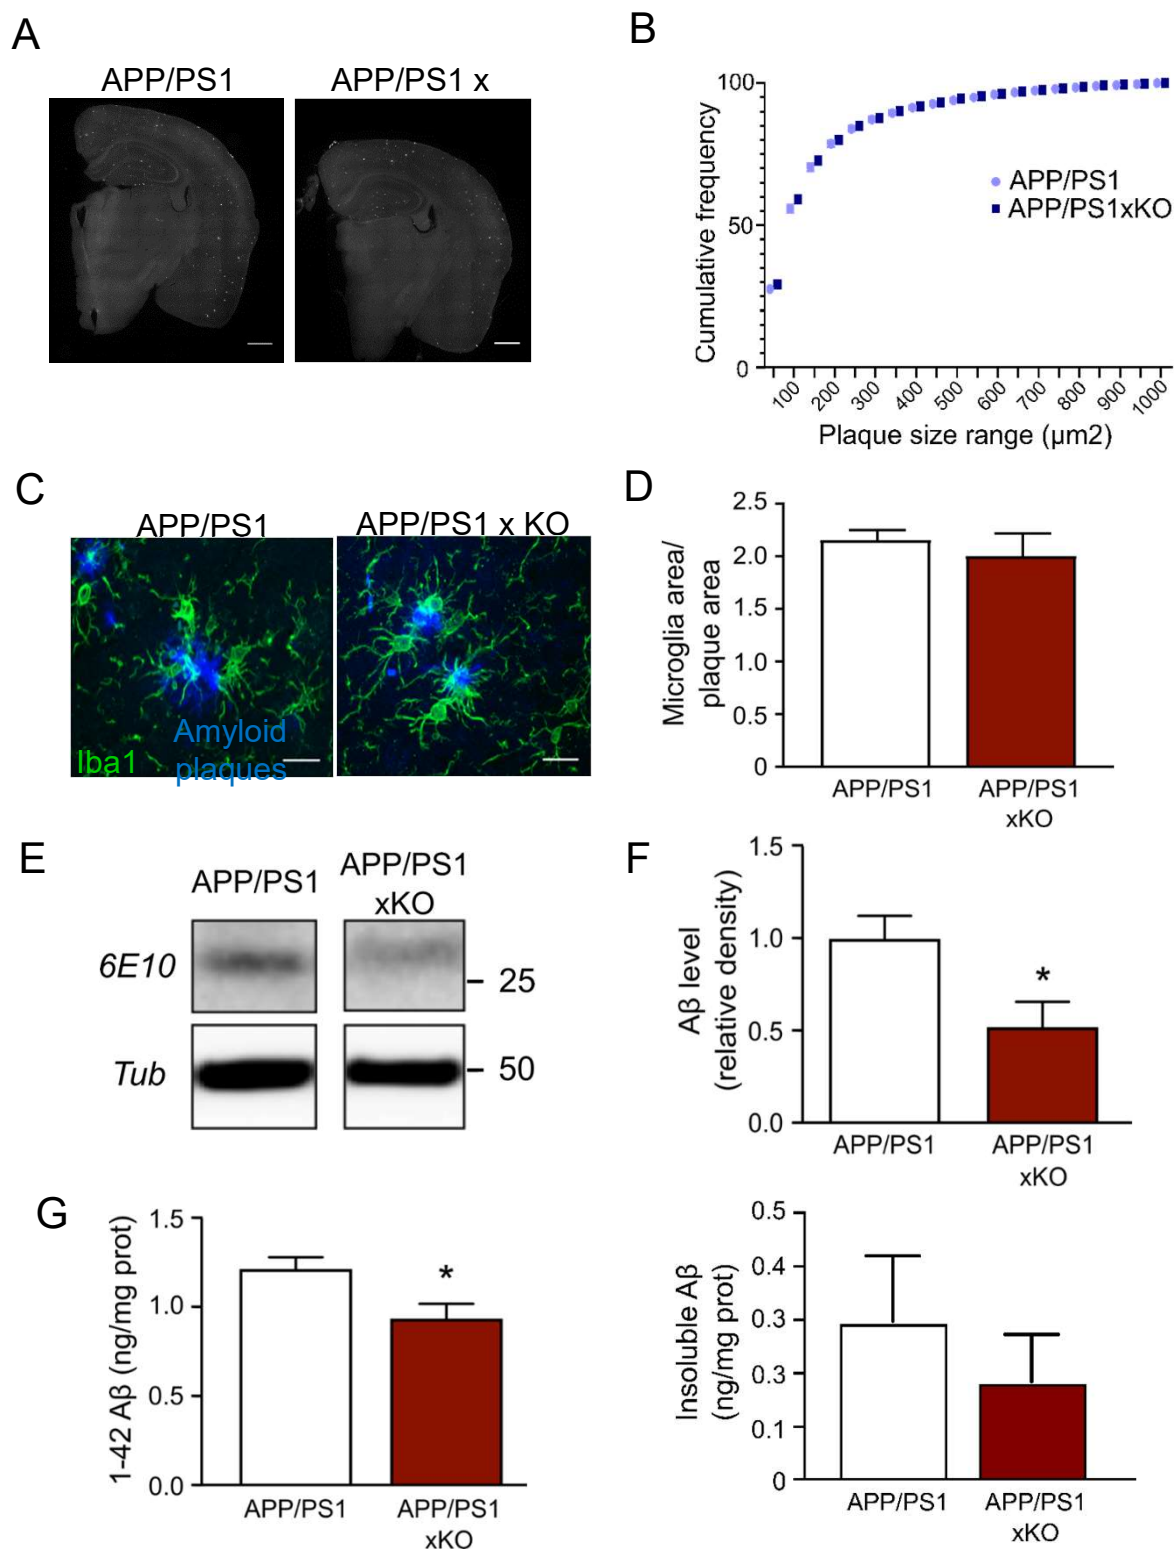

**Figure 3: Deletion of *p2x4* does not affect amyloid plaques density but reduces soluble A $\beta$  species.** (A) Representative images of Thioflavine T staining in APP/PS1 and APP/PS1xKO brain. Scale bar 700  $\mu\text{m}$ . (B) Cumulative frequency of the range size of amyloid plaques. There is no obvious difference in the number of plaques not of their size between APP/PS1 and APP/PS1xKO;  $n = 11$  mice per group. (C and D) Analysis of microglial clustering around amyloid plaque between in the cortex of APP/PS1 and APP/PS1xKO mice. (C) Representative image of microglia clustering around plaques. Amyloid plaques are stained in blue and Iba1 is in green. Scale bar 20  $\mu\text{m}$ . (D) Quantification of the area covered by microglia surrounding amyloid plaques. The ratio of the surface occupied by microglia over the surface of the plaque is expressed for both APP/PS1 and APP/PS1xKO mice.  $n = 11$  mice per group, unpaired t-test. (E) Representative Western blot of A $\beta$  peptide detected with the 6E10 antibody from cortex extracts from APP/PS1 and APP/PS1xKO mice. (F) Quantitative analysis of Western blots presented in (E). A significant decrease of the A $\beta$  peptide amount is observed in APP/PS1xKO mice.  $n = 7$  mice per group, \*  $p < 0.05$ , unpaired t-test. (G) ELISA quantification of soluble (right panel) and insoluble (left panel) A $\beta$ 1-42 peptide in the cortex of APP/PS1 and APP/PS1xKO mice. A significant decrease of the concentration of sA $\beta$  is observed in APP/PS1xKO mice, compared to APP/PS1 mice. Insoluble A $\beta$  peptide is unchanged between the two genotypes.  $N = 2$  independent experiments,  $n = 6-7$  mice per group. \*  $p < 0.05$ , unpaired t test.

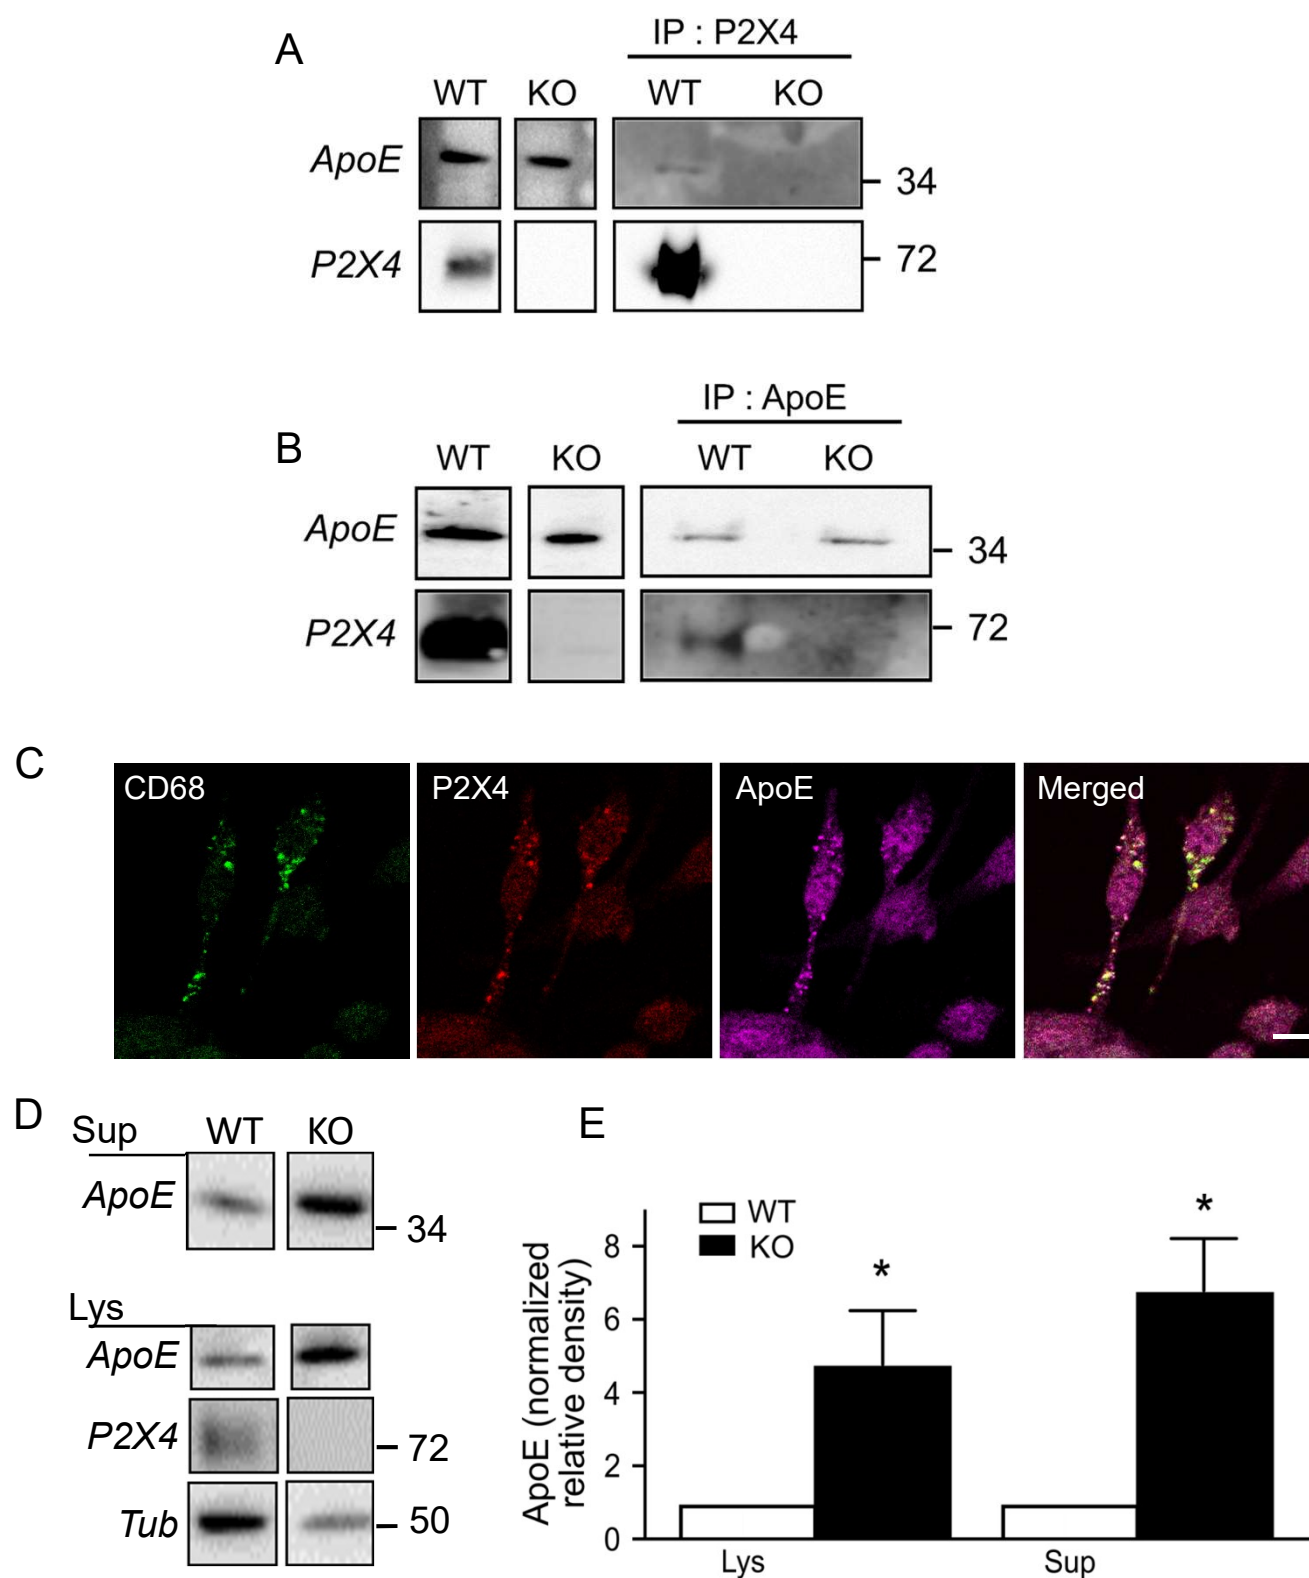

**Figure 4: P2X4 interacts with ApoE in BMDM endo-lysosomal compartments and reduces its amount compared to P2X4-deficient cells. (A, B).** Co-immunoprecipitation of P2X4 and ApoE. BMDM membrane extracts from WT and KO mice were immunoprecipitated (IP) with an anti-P2X4 antibody (A), or ApoE antibody (B). Immunoprecipitated proteins were separated by electrophoresis and immunoblotted with either anti-ApoE (top row) or anti-P2X4 (bottom row) antibodies. **(C)** Representative immunofluorescence image showing the co-localization of the lysosomal marker CD68 (green), P2X4 (red) and ApoE (purple) in BMDM cells. Scale bar 5  $\mu$ m. **(D, E)** Western blot analysis of ApoE in BMDM culture supernatants (Sup) or cell lysates (Lys) from WT and KO mice. **(D)** Representative western blot of ApoE, **(E)** Quantification of western blot presented in D. A significant increase of ApoE is observed in both KO cultures supernatants and in cell lysates. Results were normalized to ApoE signal obtained for WT BMDM in each culture. n = 6 independent cultures, \* p<0.05, unpaired t test.

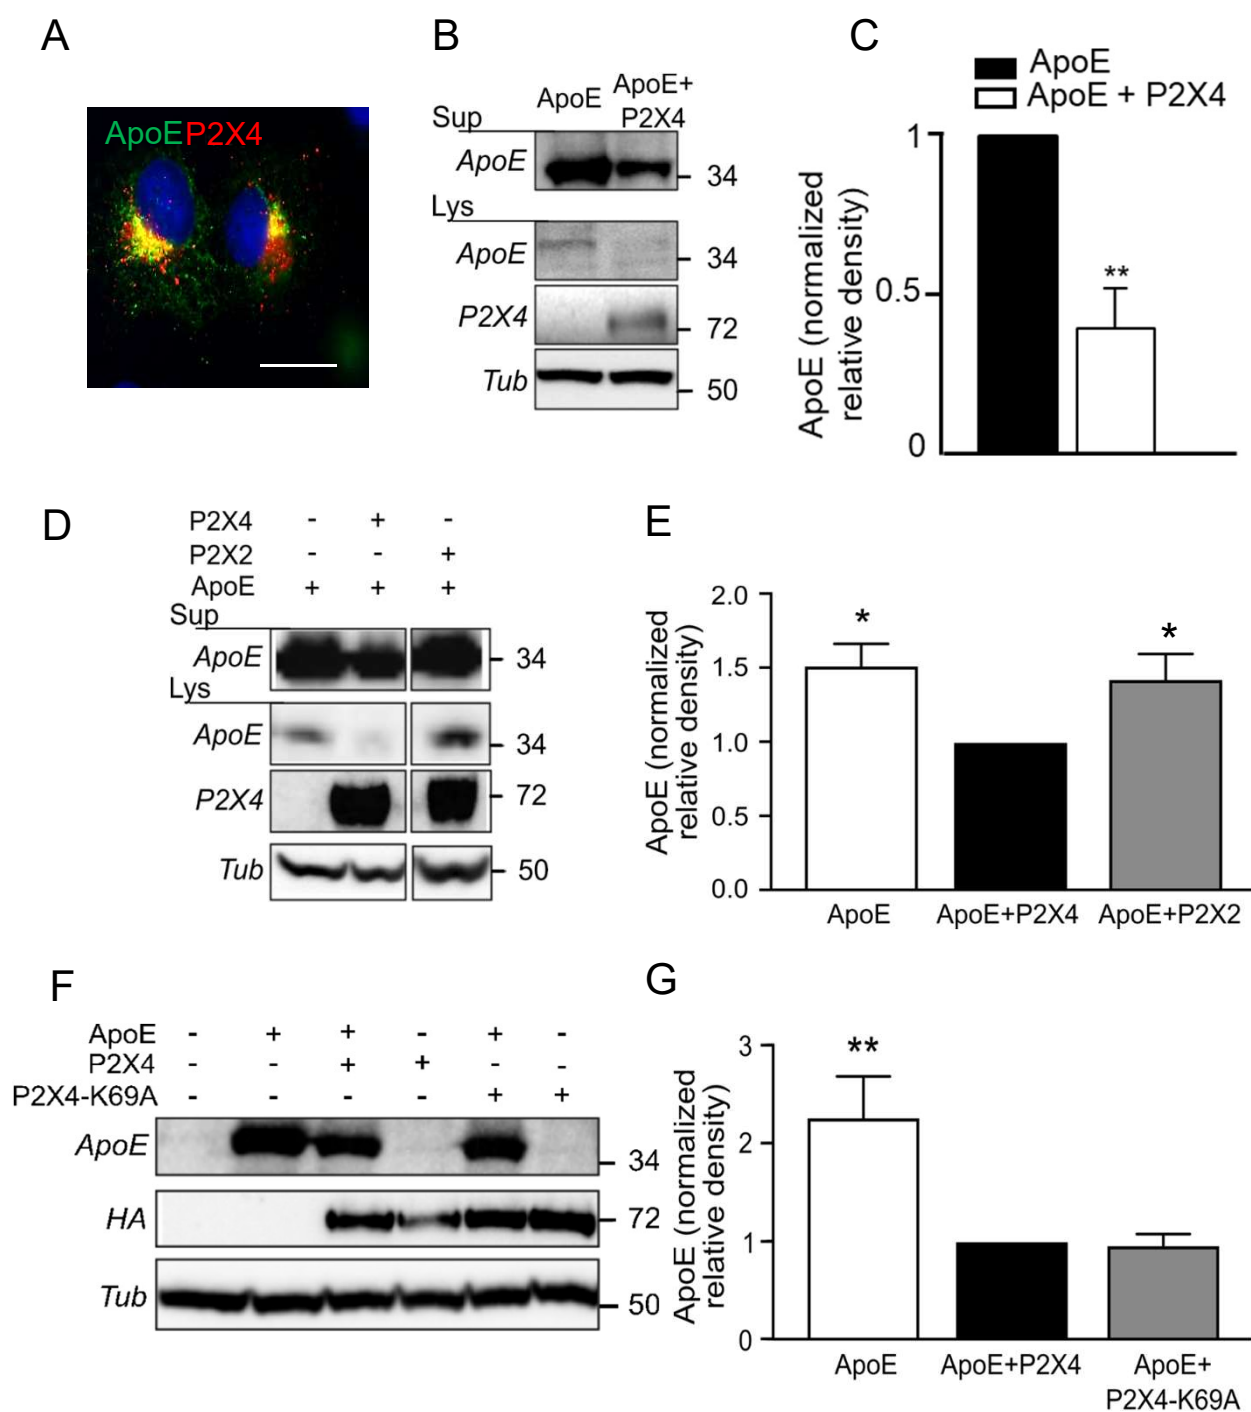

**Figure 5: Characterization of the interaction between P2X4 and ApoE in recombinant system.**

(A) Representative immunofluorescence of ApoE (green) and P2X4 (red), and DAPI (blue) in co-transfected COS-7 cells. Both ApoE and P2X4 co-localize in intracellular compartments. Scale bar 10  $\mu$ m. (B, C) Comparison of ApoE expression upon co-transfection with P2X4. COS-7 cells were transfected with ApoE alone or in combination with P2X4. Expression of ApoE was analyzed by Western blot in both cell culture supernatants and cell lysates (B). Quantitative analysis shows that in the presence of P2X4, amounts of ApoE is reduced in both culture supernatant (Sup) and cell lysates (Lys) (C).  $n = 3$  independent experiments, \*\*  $p < 0.01$ , One sample t-test compared to theoretical value of 1. (D, E) Comparison of ApoE expression upon co-transfection with P2X4 or P2X2. (D) Expression of ApoE was analyzed by Western blot in both cell culture supernatants and cell lysates (E) Quantitative analysis of ApoE in supernatant shows that co-expression with P2X4 reduces the expression of ApoE, whereas that of P2X2 has no effect.  $n = 6$  independent experiments, \*  $p < 0.05$ , One sample Wilcoxon compared to theoretical value of 1. (F, G) P2X4 activity is not necessary to reduce ApoE levels. (F) Expression of ApoE was analyzed by Western blot in cell culture supernatants of cells transfected with ApoE alone or in combination of either P2X4 or P2X4-K69A, an ATP binding site dead mutant. (G) Quantitative analysis shows that both P2X4 and P2X4-K69A significantly reduces the ApoE levels to the same extend.  $n = 8$  independent experiments, \*\*  $p < 0.01$ , one sample t-test compared to theoretical value of 1.

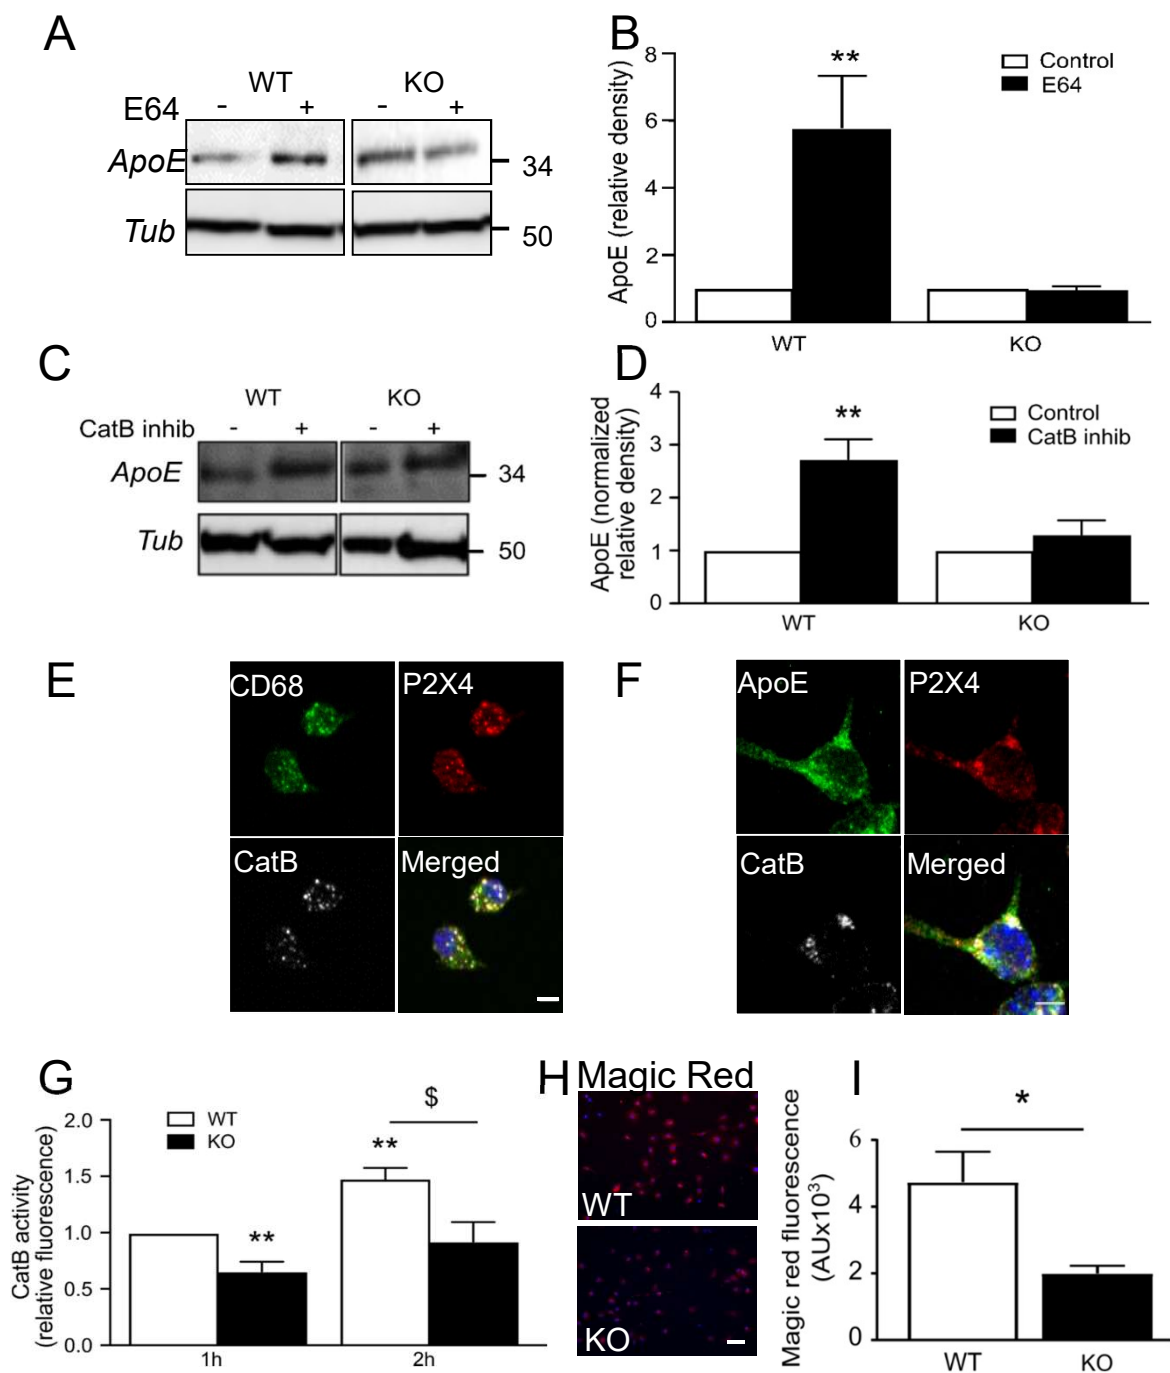

**Figure 6: P2X4 regulates cathepsin B-dependent ApoE degradation.**

(A, B) Comparison of treatment with E64 a pharmacological inhibitor of the cysteine proteases, on ApoE expression in BMDM culture of WT and P2X4<sup>-/-</sup> mice. (A) Representative western blot of ApoE in the supernatant of WT and P2X4<sup>-/-</sup> BMDM after incubation with 10  $\mu$ M E64. (B) Quantitative analysis of western blots shows that E64 induced a strong increase of ApoE in the supernatant of WT but not in P2X4<sup>-/-</sup> BMDM. n = 5 independent experiments, \*\* p<0.01, One sample t-test compared to theoretical value of 1. (C, D) Comparison of treatment with 20  $\mu$ M Z-Phe-Ala-FMK, a CatB inhibitor, on ApoE expression in BMDM culture of WT and P2X4<sup>-/-</sup> mice. (C) Representative western blot of ApoE in the supernatant of WT and P2X4<sup>-/-</sup> BMDM after incubation with Z-Phe-Ala-FMK. (D) Quantitative analysis shows that inhibition of CatB with Z-Phe-Ala-FMK induces a strong increase of ApoE in the supernatant of WT but not in P2X4<sup>-/-</sup> BMDM. n = 6 experiments, \*\* p<0.01, One sample t-test compared to theoretical value of 1. (E, F) Co-localization in BMDM of P2X4, ApoE and CatB in CD68 positive compartments. (E) Representative picture of CD68 (green), P2X4 (red) and CatB (white) immunostaining in BMDM cells. Scale bar 5  $\mu$ m. (F) Representative immunostaining of ApoE (green), P2X4 (red) and CatB (white) in BMDM cells. Scale bar 5  $\mu$ m. (G, H, I) P2X4 regulates CatB activity in BMDM. (G) CatB activity was measured using the cell-permeable fluorogenic CatB substrate Z-RR-AMC. After incubation with 100  $\mu$ M Z-RR-AMC, fluorescence was read at 1 h and 2 h. A significant increase of the signal is observed in WT macrophages between 1 h and 2 h, whereas the activity in KO cells remained unchanged. n = 8 experiments, \*\* p<0.01, One sample t-test compared to theoretical value of 1 WT(1 h) vs KO (1 h) and WT (1 h) vs WT(2 h), \$ p<0,05 Kruskal-Wallis test WT(2 h) vs KO (2 h); KO (1 h) vs KO (2 h) is non-significant. (H) Representative microscopic image of cellular CatB activity in WT and P2X4<sup>-/-</sup> BMDM using the Magic red cathepsin B kit. A strong signal is observed in WT BMDM as compared to P2X4<sup>-/-</sup> cells. (I) Quantitative analysis of the magic Red fluorescence using ImageJ. \* p<0.05, n = 3 independent cultures, unpaired t-test. Scale bar 30  $\mu$ m.



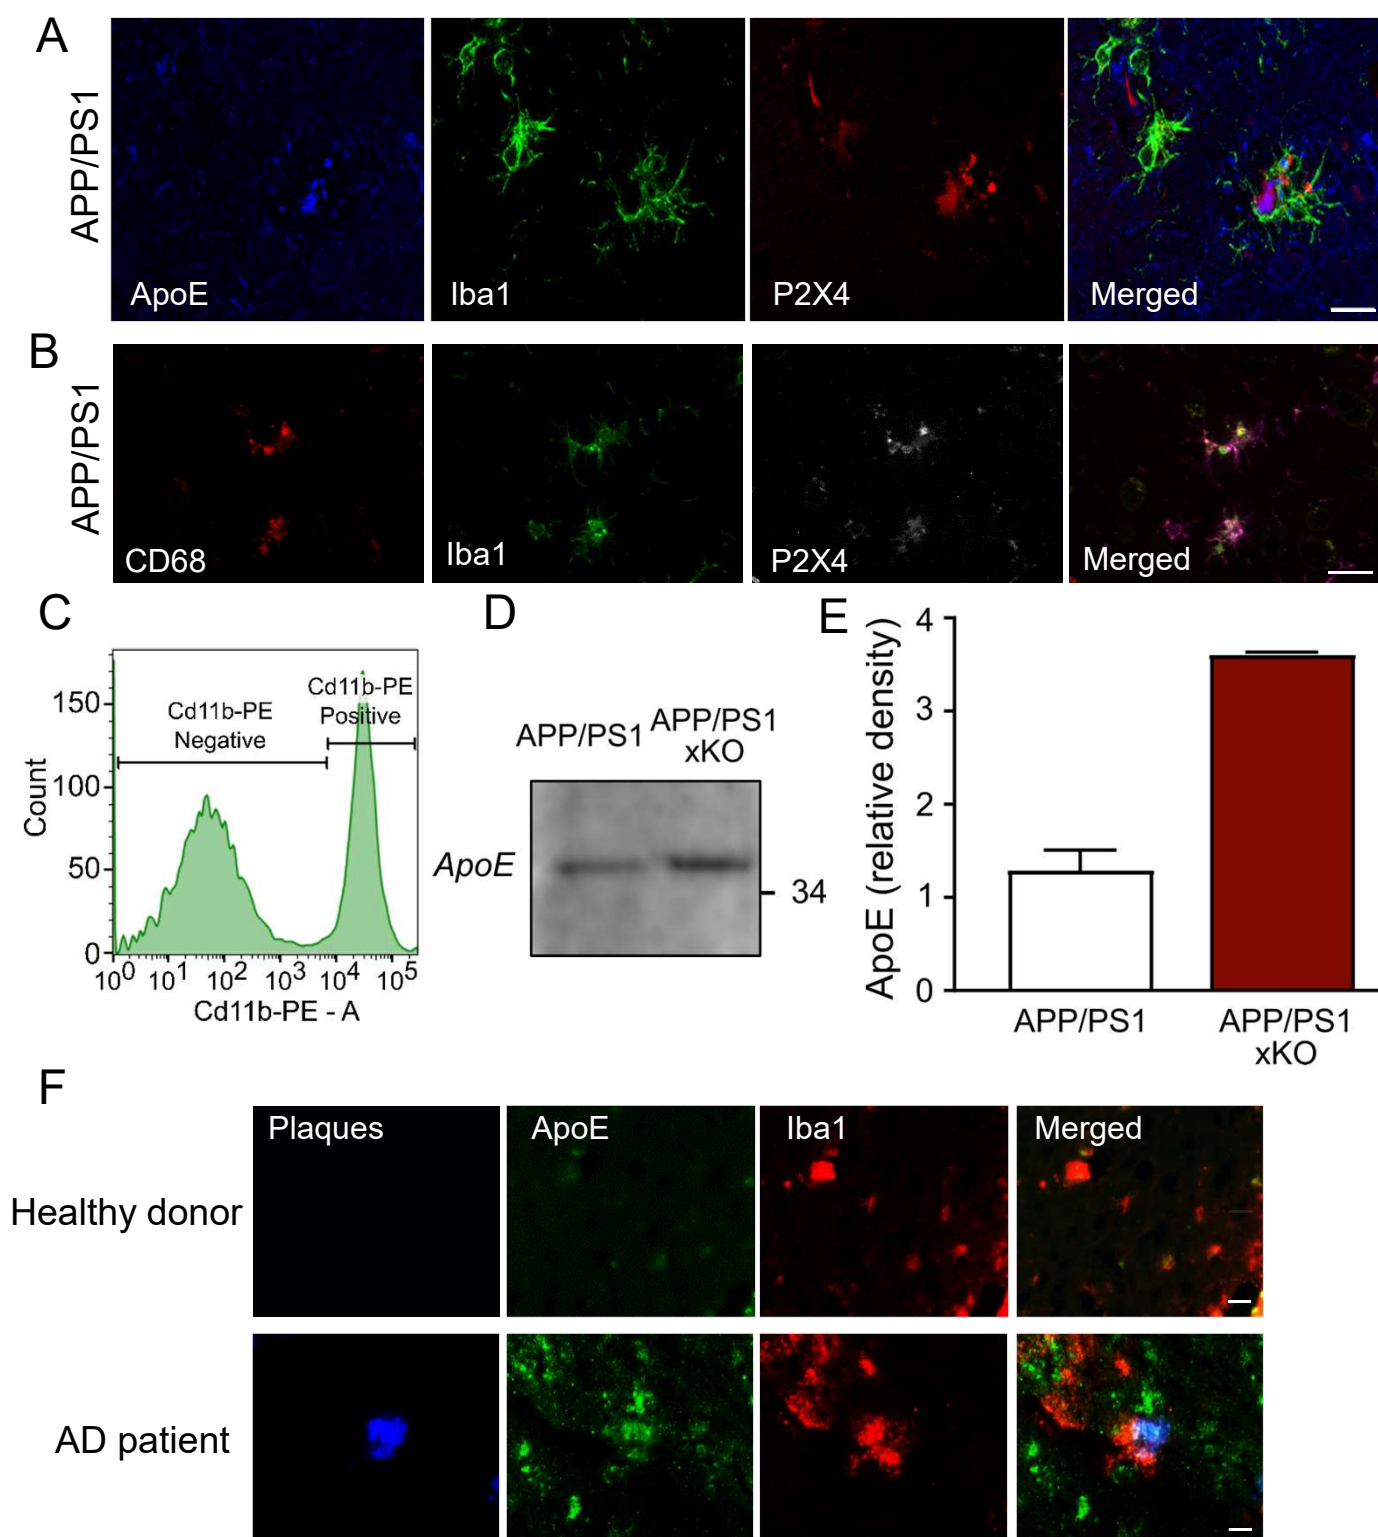

**Figure 7: Increased ApoE in microglia from APP/PS1xKO mice and AD patients.**

(A) Immunofluorescence of ApoE (blue), Iba1 (green) and P2X4 (red) in APP/PS1 mice cortex. Scale bar 10  $\mu$ m. (B) Immunofluorescence of CD68 (red), Iba1 (green), P2X4 (white) in APP/PS1 mice cortex. Scale bar 20  $\mu$ m. (C, D, E) Analysis of ApoE expression in FACS sorted microglia from APP/PS1 and APP/PS1xKO mice. (C) Microglia were sorted based on CD11b-PE positive selection. (D) Representative western blot of ApoE from APP/PS1 and APP/PS1xKO FACS-sorted cortical microglia. (E) Quantitative analysis of signals presented in C shows an increase in ApoE in APP/PS1xKO mice relative to APP/PS1 mice. N = 2 independent experiments, n = 2 mice per group. (F) Representative pictures of cortical brain slices from healthy donor and AD patients labeled with AmyloGlo (blue, amyloid plaques), ApoE (green) and Iba1 (red) showing an increased expression of ApoE in human microglia clustered around amyloid deposit. Scale bar 20  $\mu$ m.
